# Supplementary material for: Reverse regioselectivity in Pd(0)/InI-mediated allylation of aldehydes with ε-amido-allylindiums generated from β-lactams. A new entry to non-racemic highly substituted γ-butyrolactones
Source: Royal Society of Chemistry journal article supplement (doi:10.1039/c6ra00517a), 2016-01-01
Supplement: c6ra00517a1.pdf [file c6ra00517a1.pdf]

## Electronic Supplementary Information

### **Reverse regioselectivity in Pd(0)/InI mediated allylation of aldehydes with $\epsilon$ -amido-allylindiums generated from $\beta$ -lactams. A new entry to nonracemic highly substituted $\gamma$ -butyrolactones.**

Urszula Klimczak, Olga Staszewska-Krajewska, Bartosz K. Zambrón\*

Institute of Organic Chemistry, Polish Academy of Sciences  
Kasprzaka 44/52, 01-224 Warsaw, Poland

*E-Mail:* [bartosz.zambron@icho.edu.pl](mailto:bartosz.zambron@icho.edu.pl)

|                                                                 |    |
|-----------------------------------------------------------------|----|
| Copies of $^1\text{H}$ NMR and $^{13}\text{C}$ NMR spectra..... | 2  |
| Copies of $^{19}\text{F}$ NMR spectra of Moscher's esters.....  | 31 |
| HPLC chromatograms of (-)-I and ( $\pm$ )-I.....                | 33 |
| References.....                                                 | 34 |

# Copies of $^1\text{H}$ NMR and $^{13}\text{C}$ NMR spectra

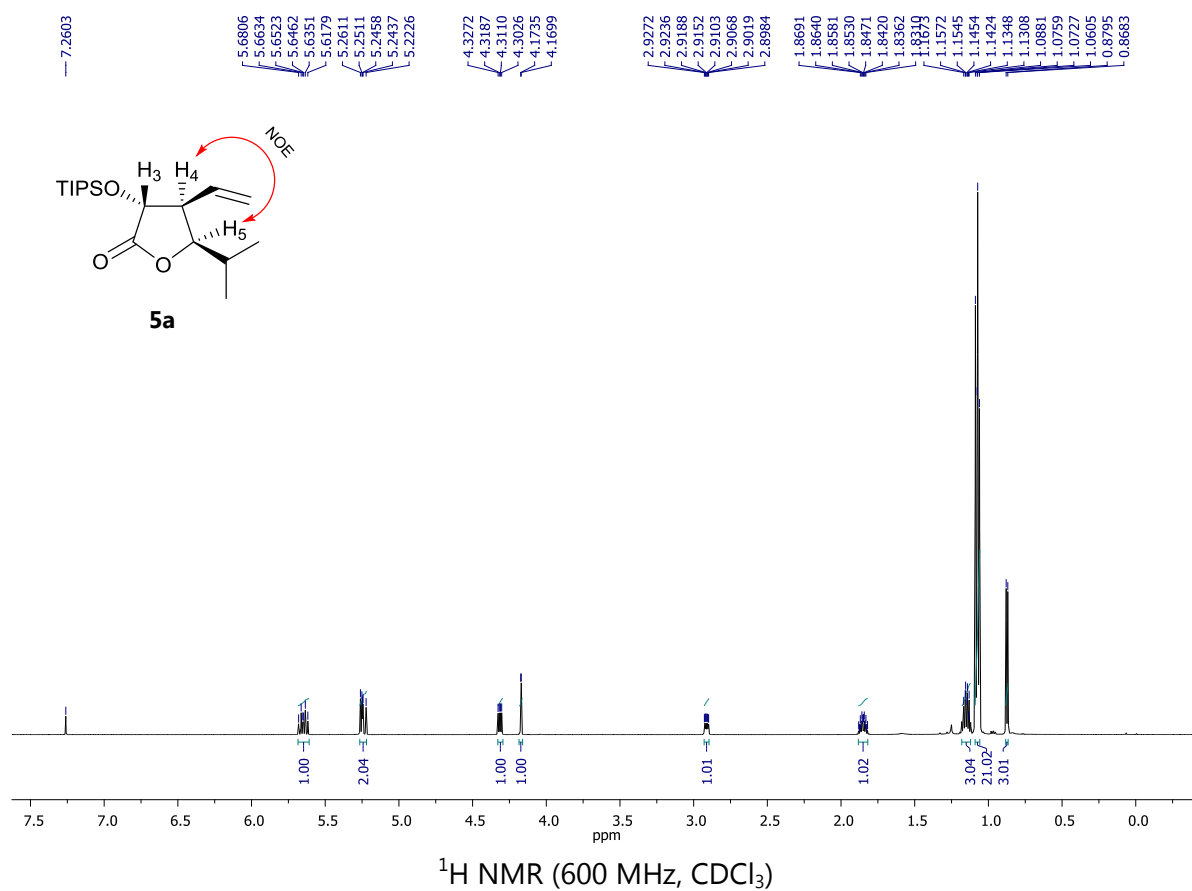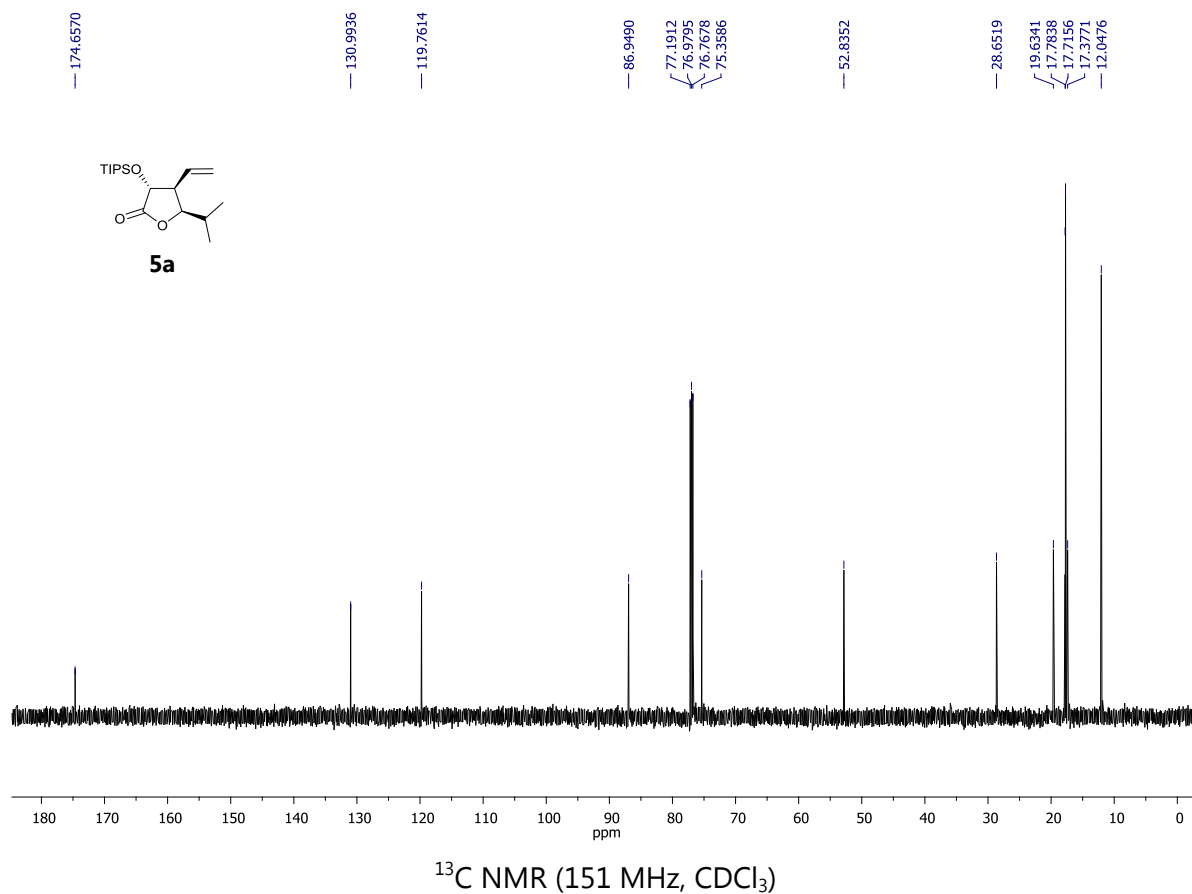

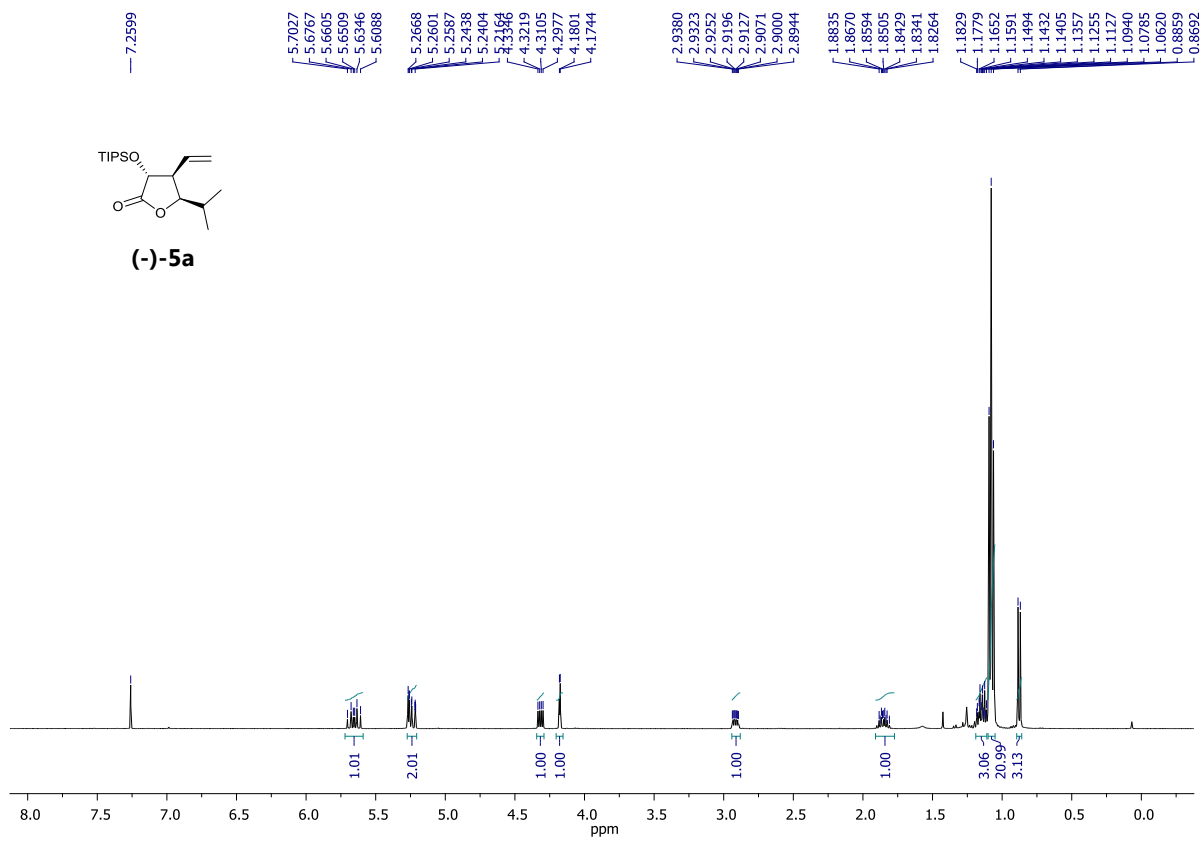

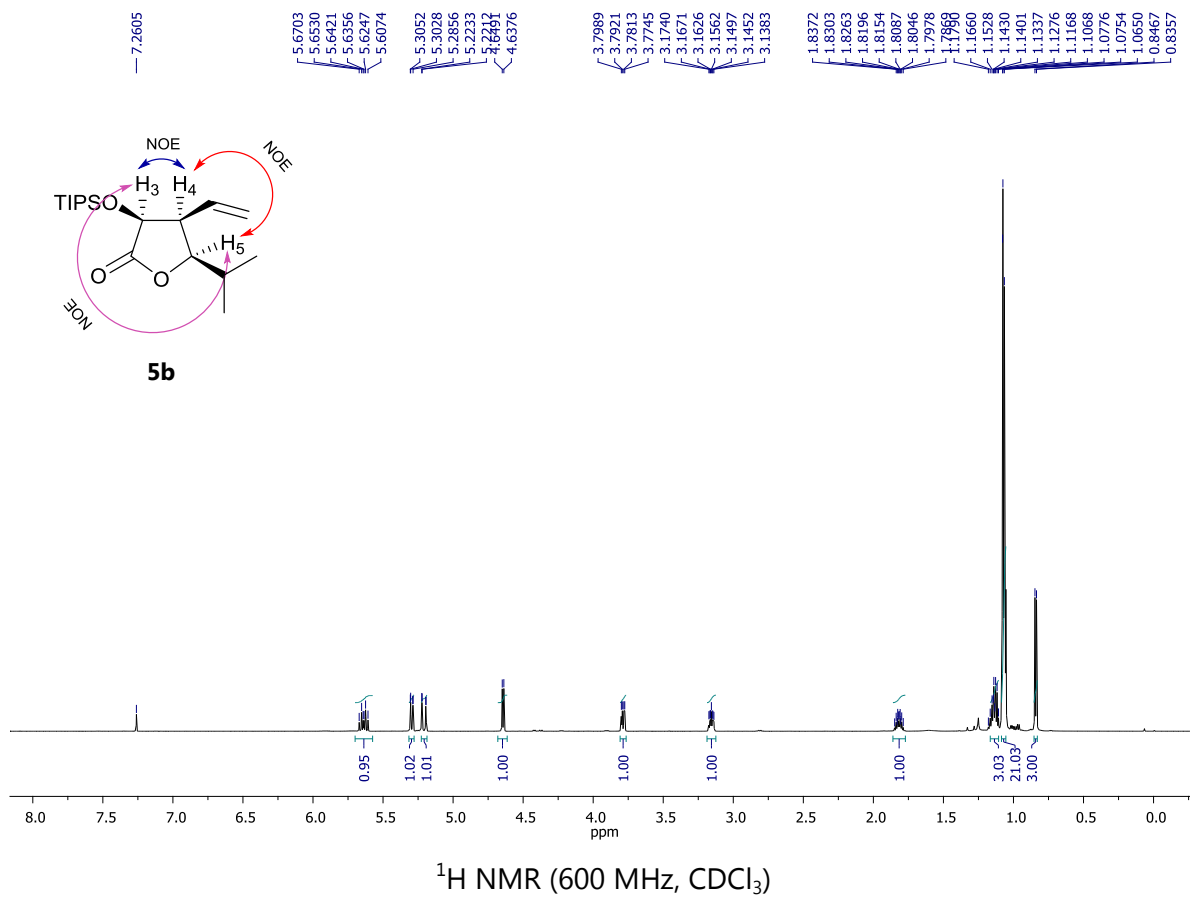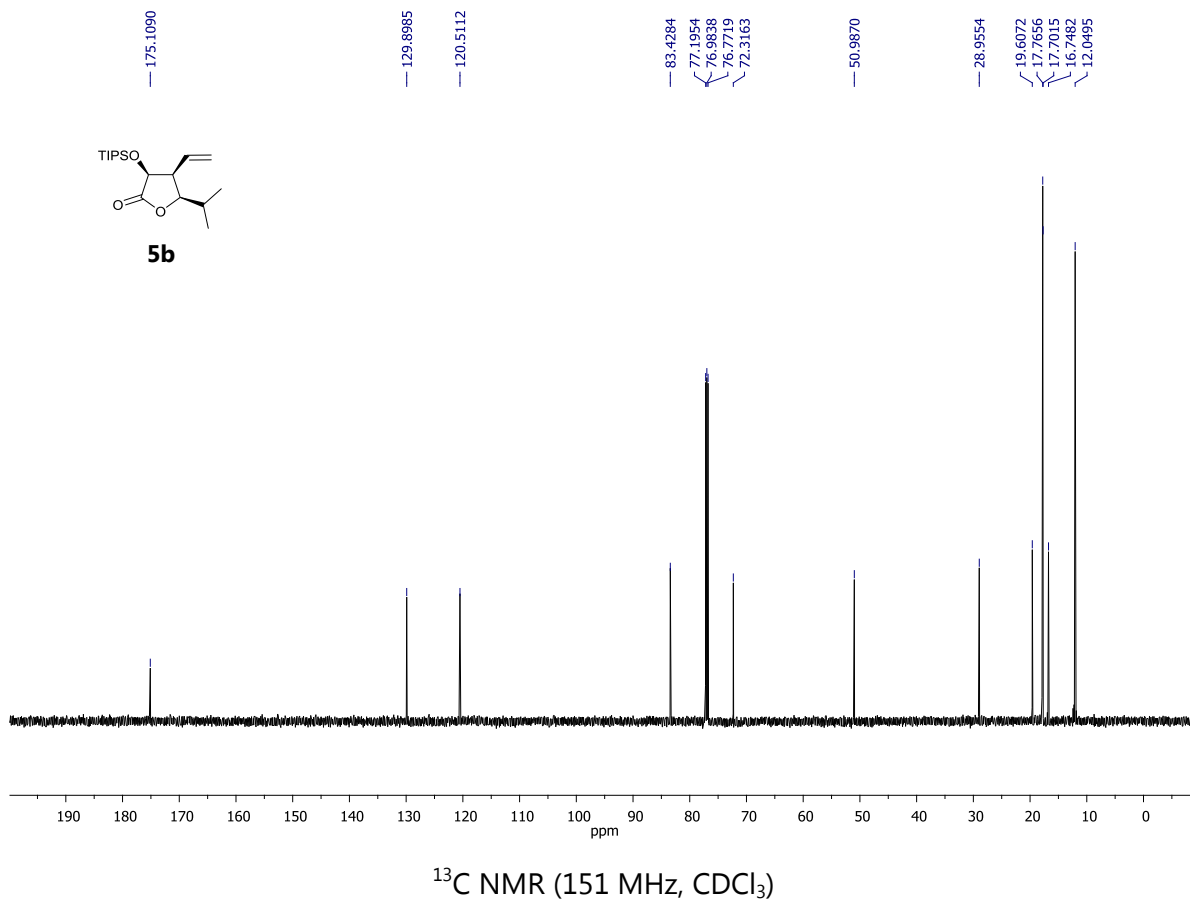

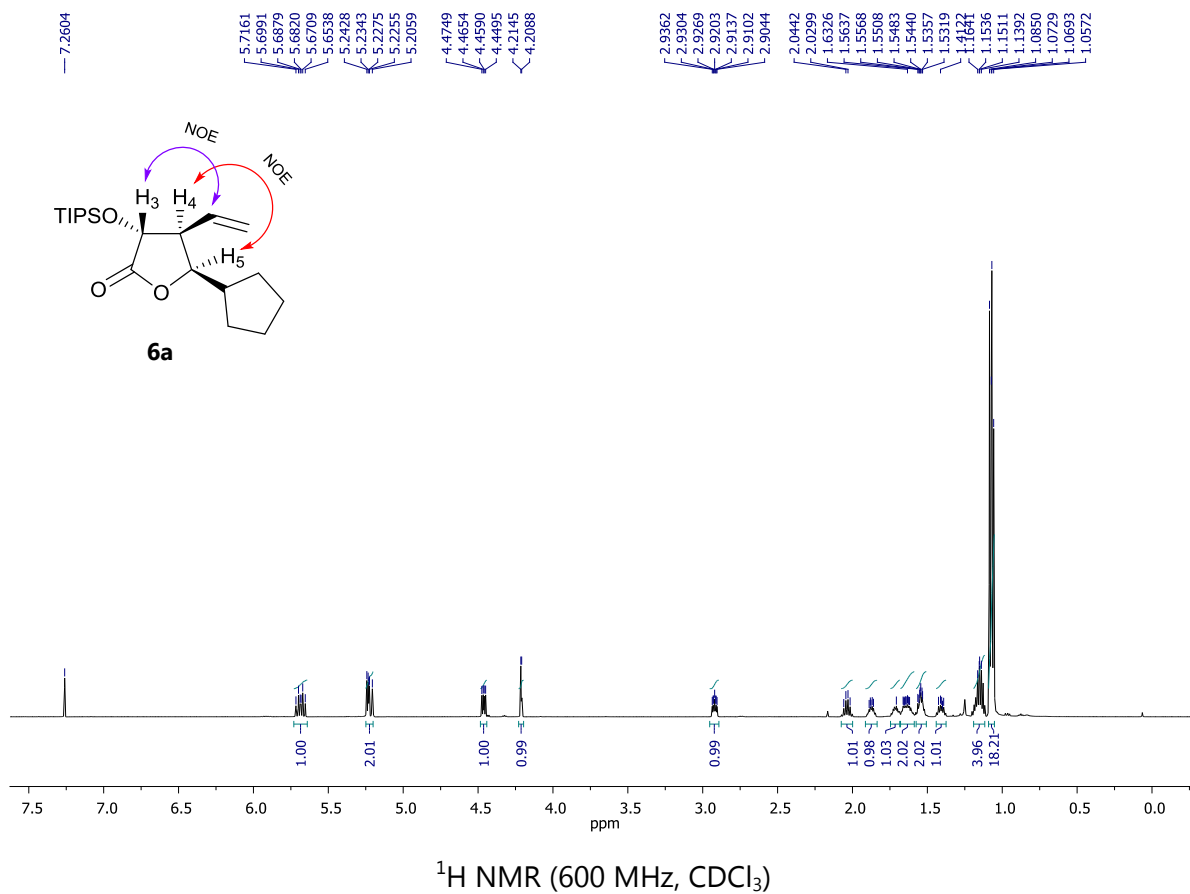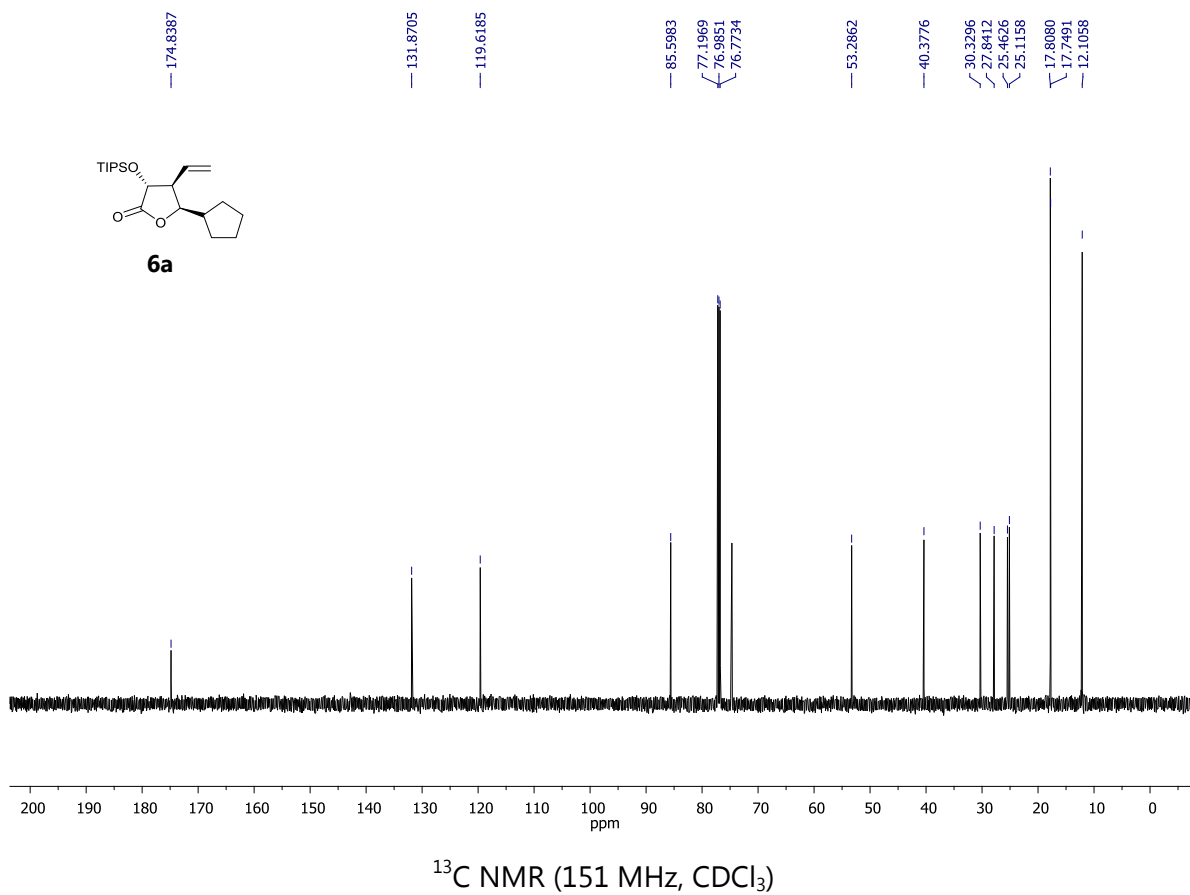

7.2602  
5.7238  
5.7065  
5.6956  
5.6892  
5.6783  
5.6610  
5.2849  
5.2823  
5.2677  
5.2652  
5.1989  
5.1966  
5.1706  
5.1684  
4.6501  
4.6385  
3.9933  
3.9862  
3.9758  
3.9686  
3.1324  
3.1252  
3.1209  
3.1145  
3.1079  
3.1036  
3.0964  
2.0516  
2.0382  
2.0345  
2.0246  
2.0209  
2.0074  
1.9429  
1.9306  
1.7362  
1.7305  
1.7234  
1.6228  
1.6138  
1.6113  
1.6073  
1.6028  
1.5954  
1.5865  
1.5779  
1.5619  
1.5576  
1.5529  
1.5509  
1.5452  
1.5377  
1.5325  
1.5272  
1.5249  
1.5191  
1.4202  
1.4076  
1.3994  
1.3863  
1.1653  
1.1520  
1.1396  
1.1329  
1.1270  
1.1162  
1.1063  
1.0761  
1.0655  
1.0417

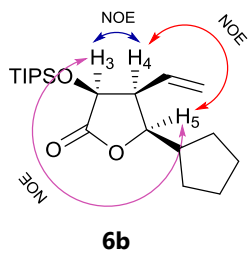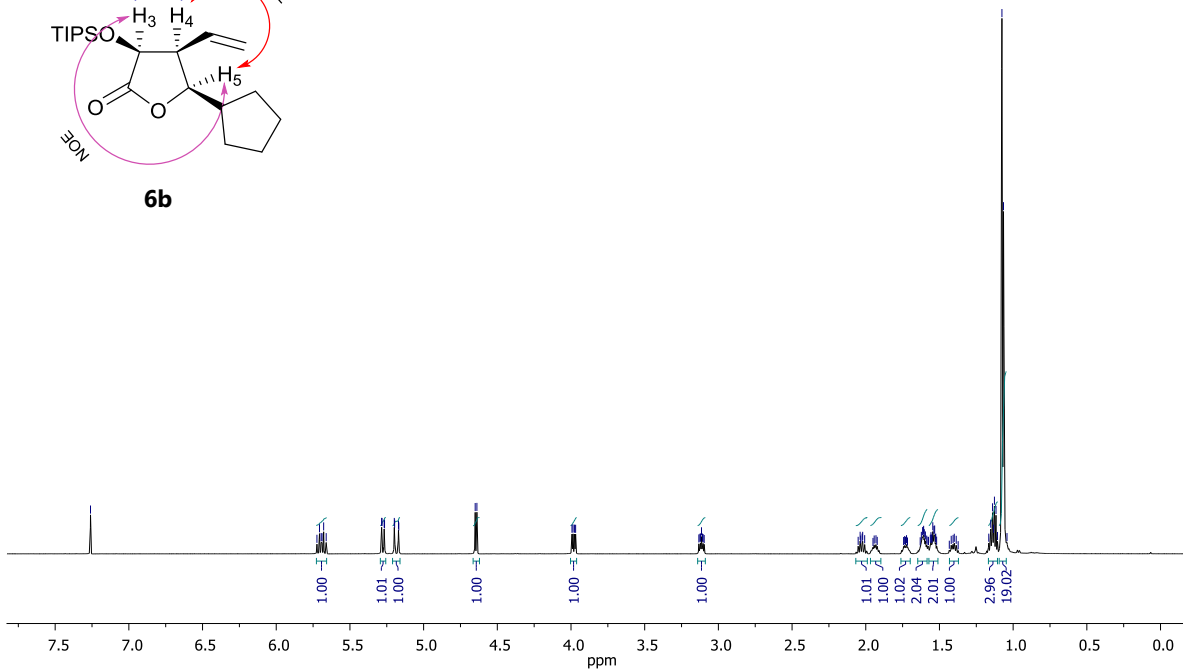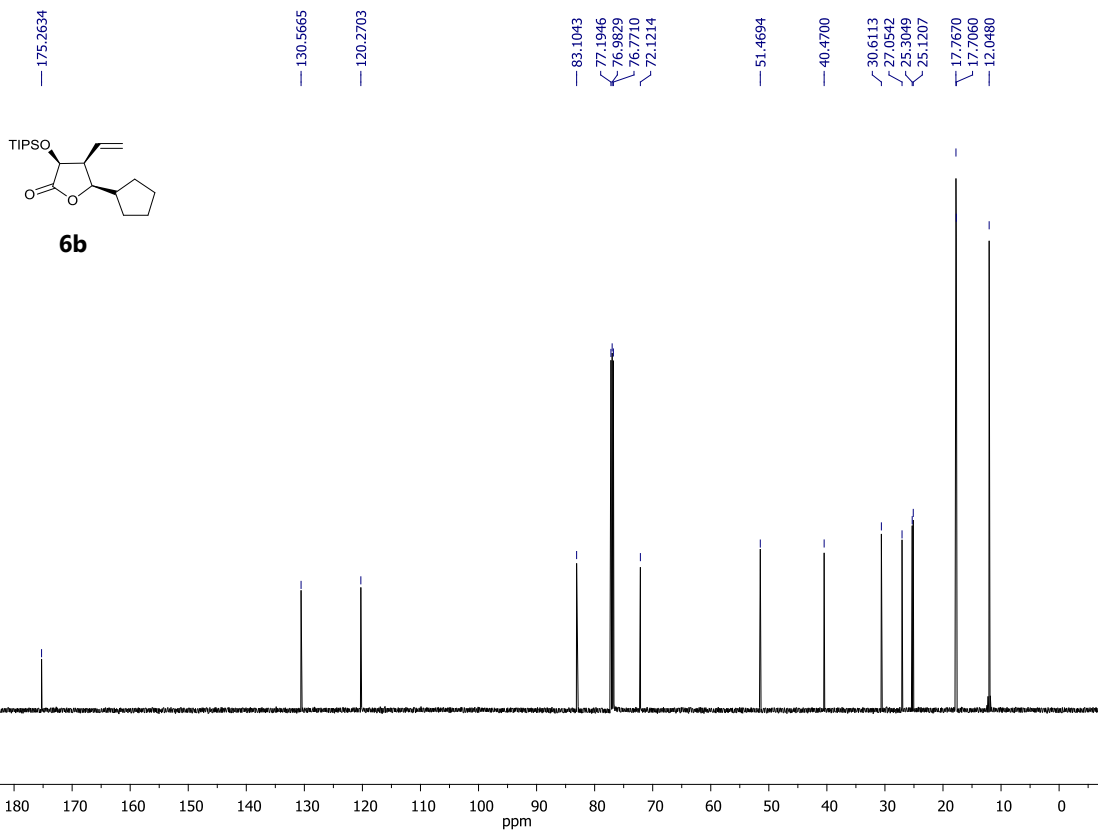

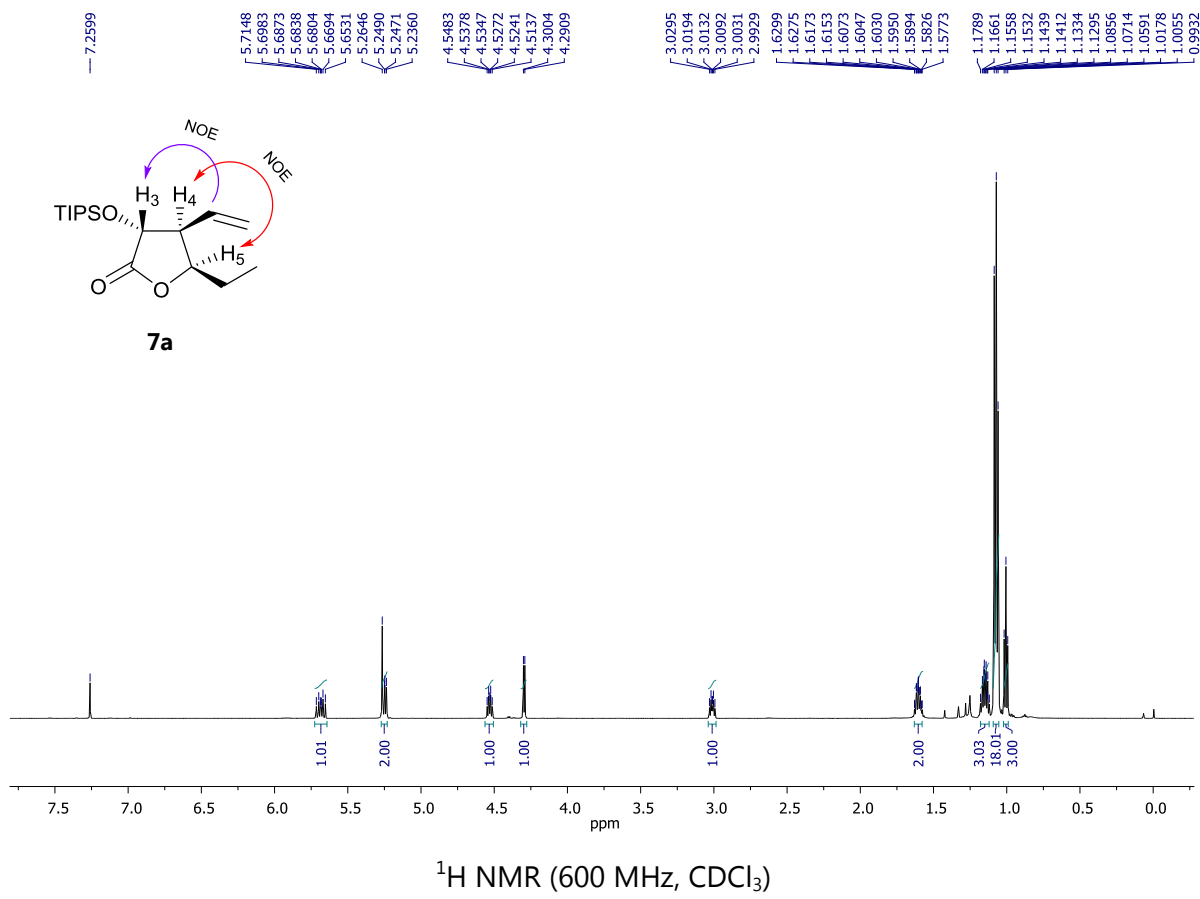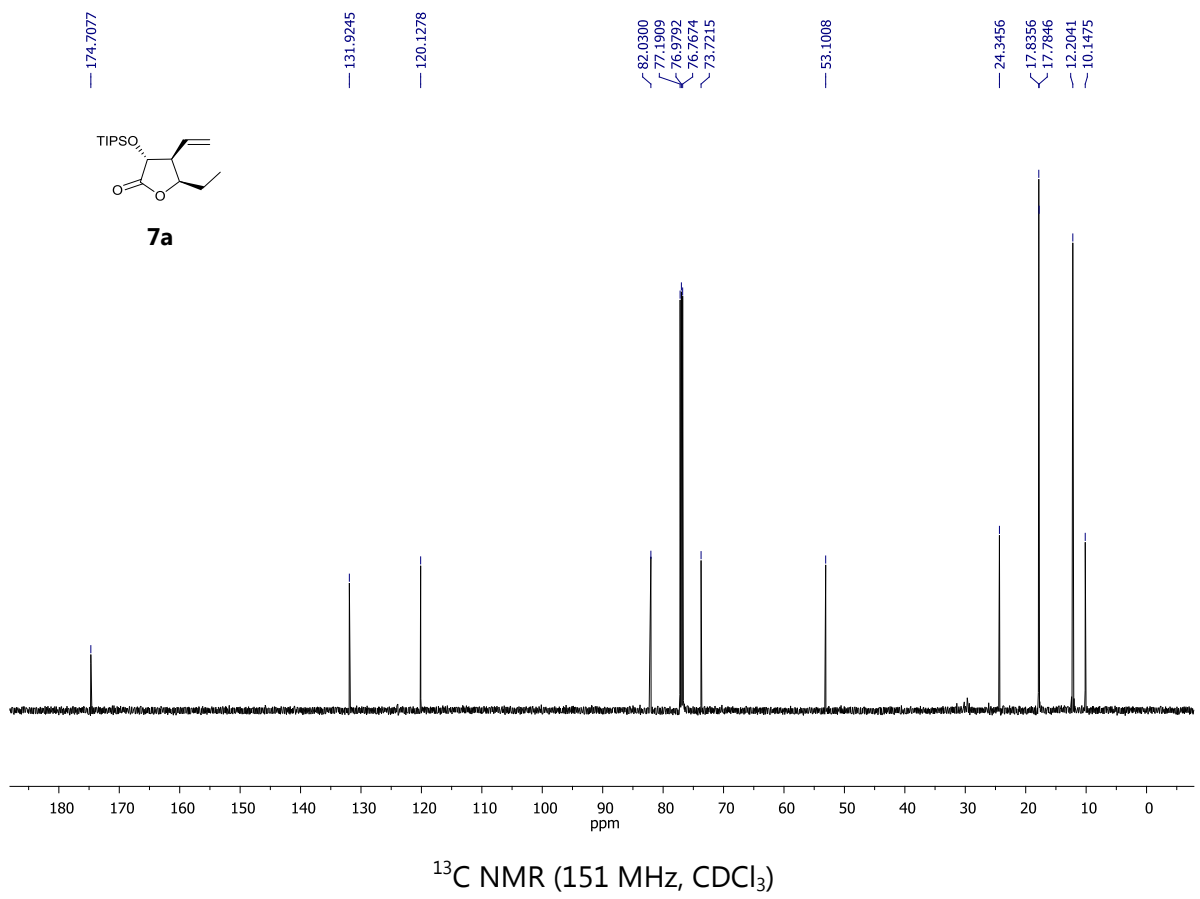

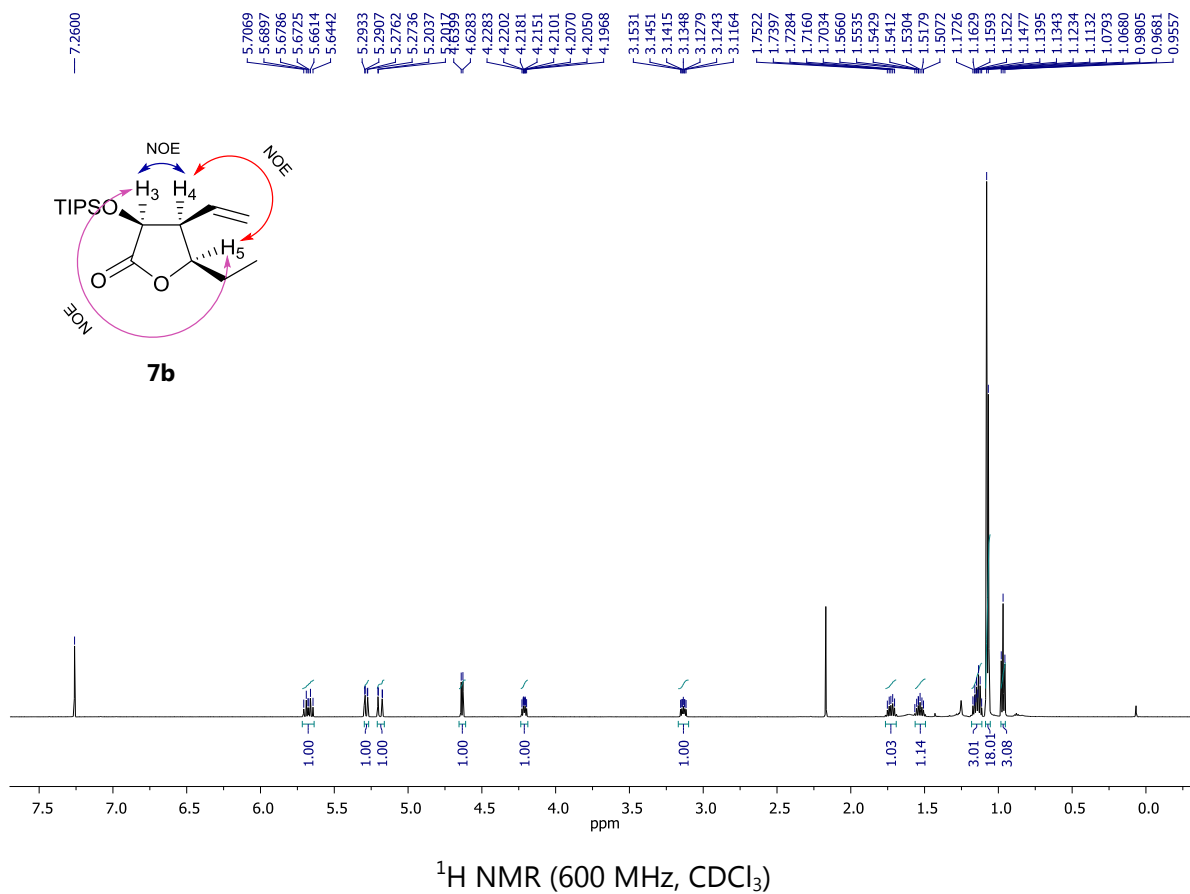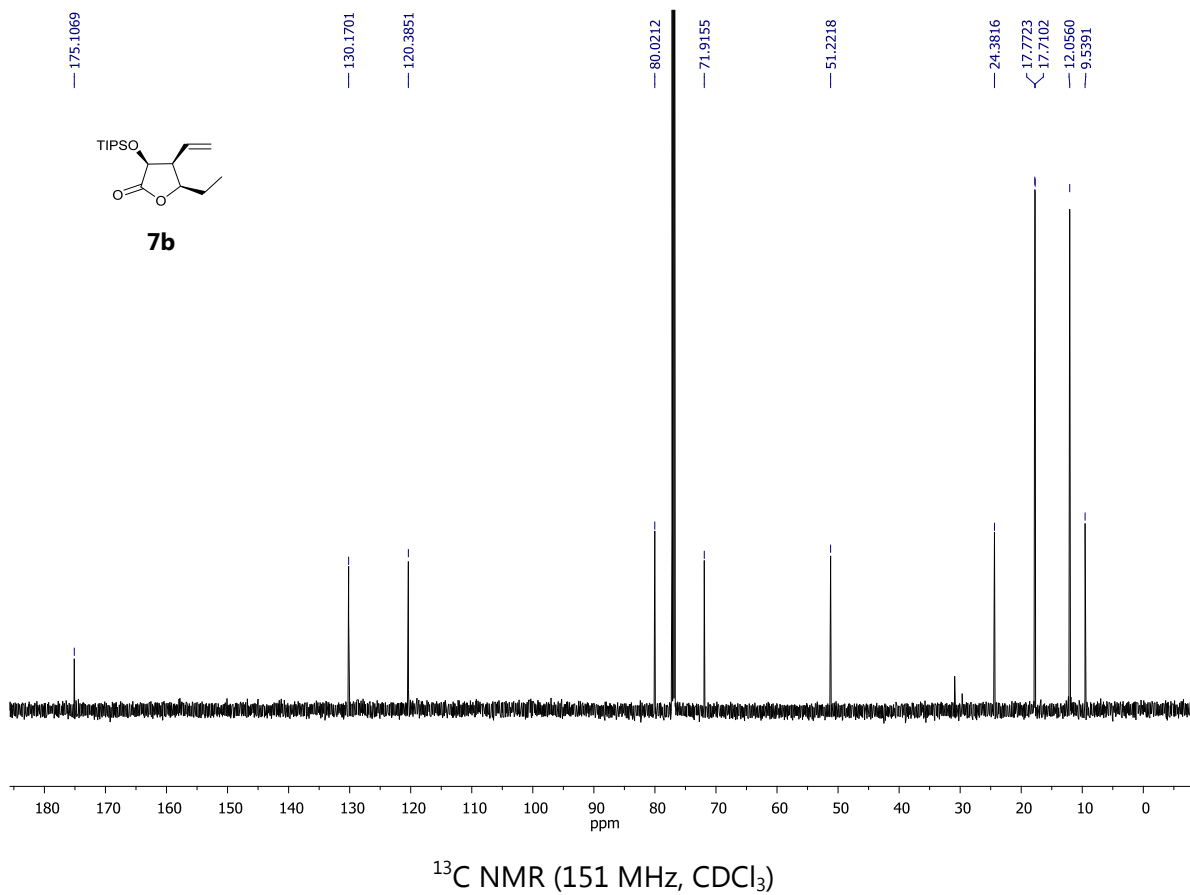



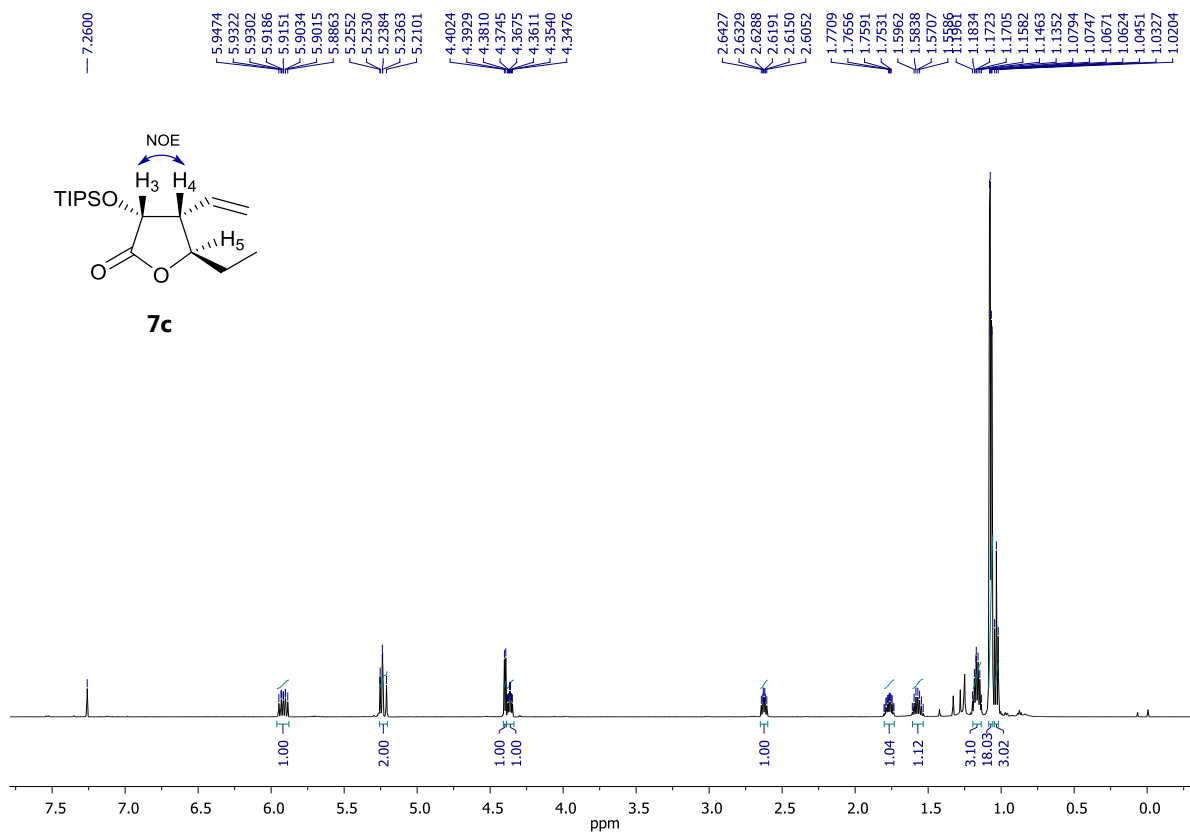

<sup>1</sup>H NMR (600 MHz, CDCl<sub>3</sub>:C<sub>6</sub>D<sub>6</sub> 3:2)

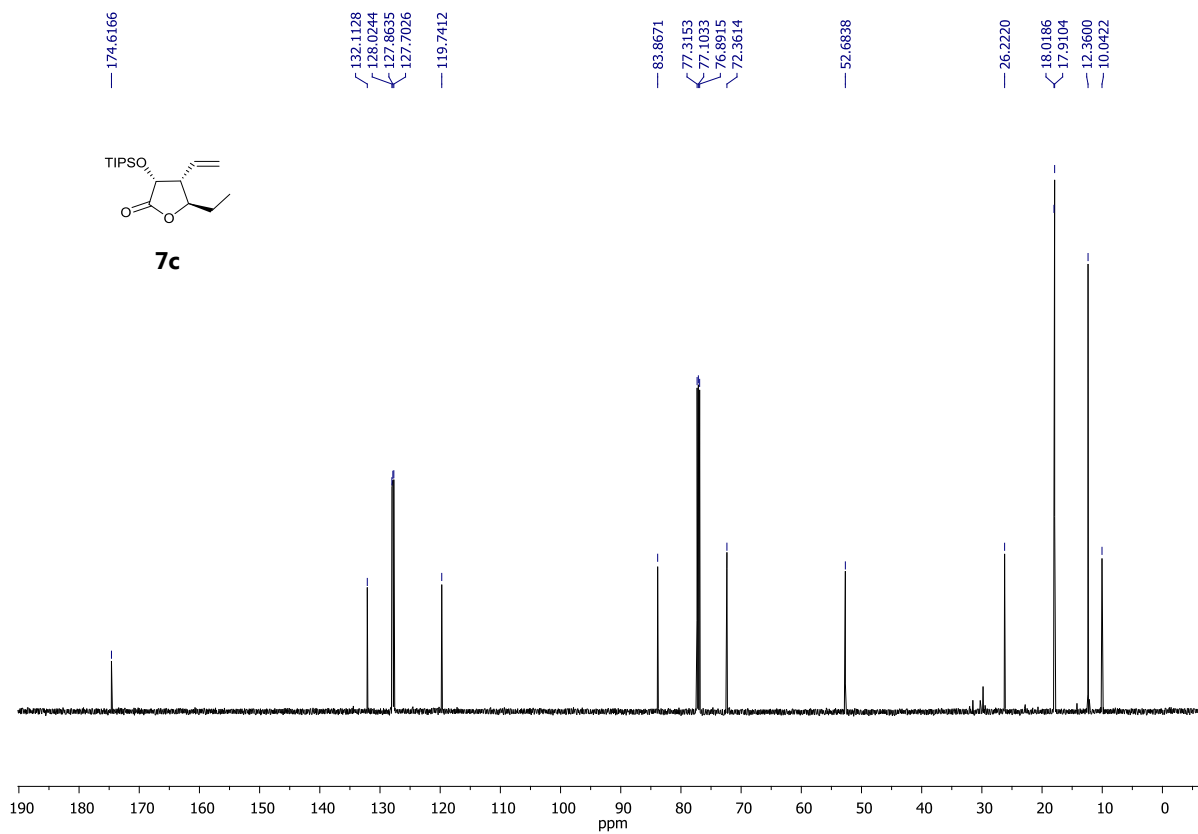

<sup>13</sup>C NMR (151 MHz, CDCl<sub>3</sub>:C<sub>6</sub>D<sub>6</sub> 3:2)

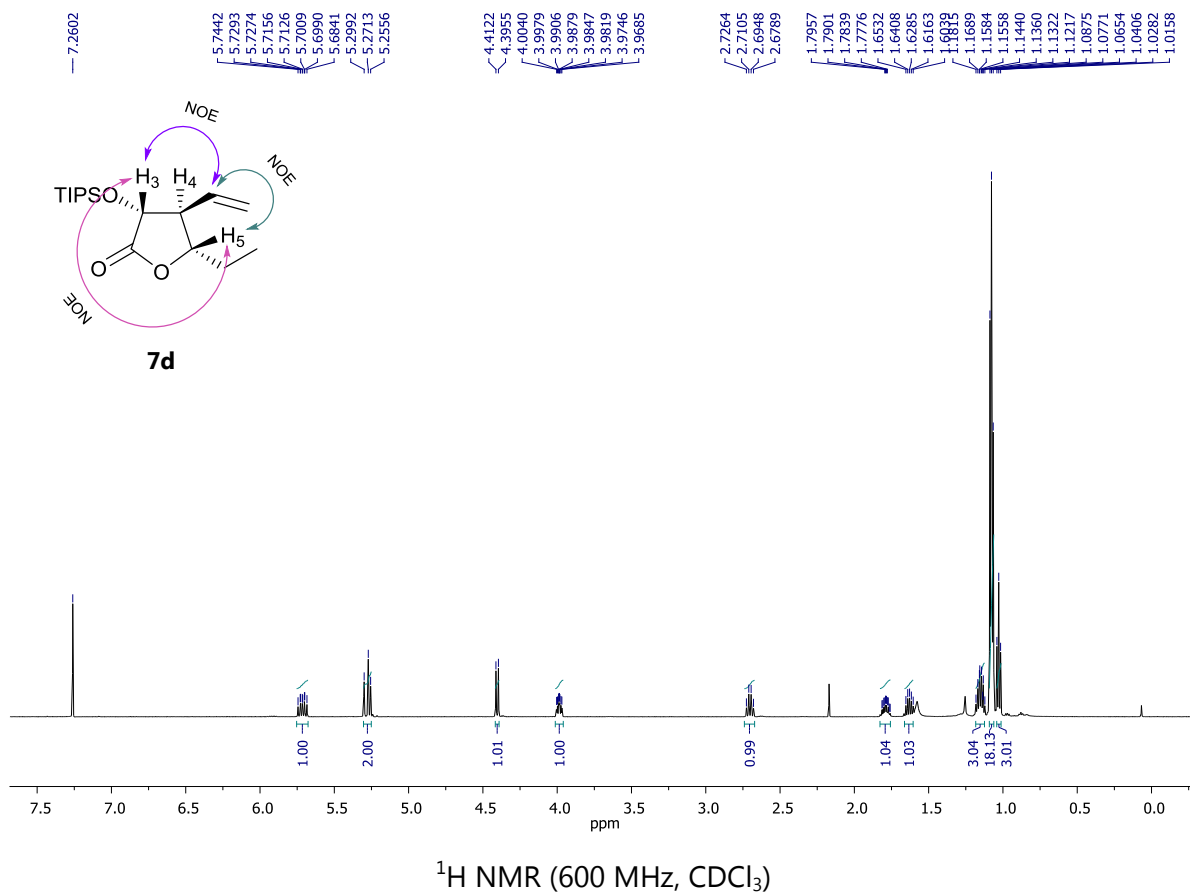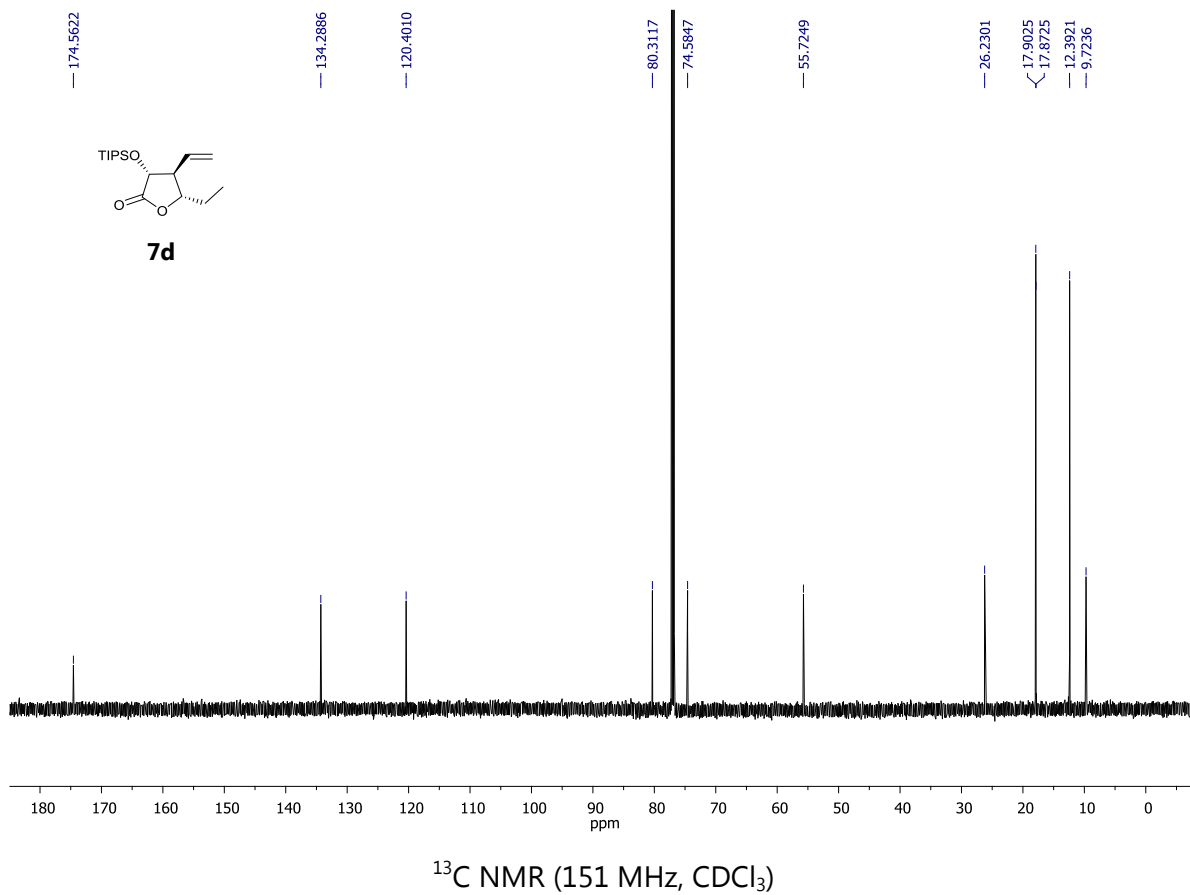

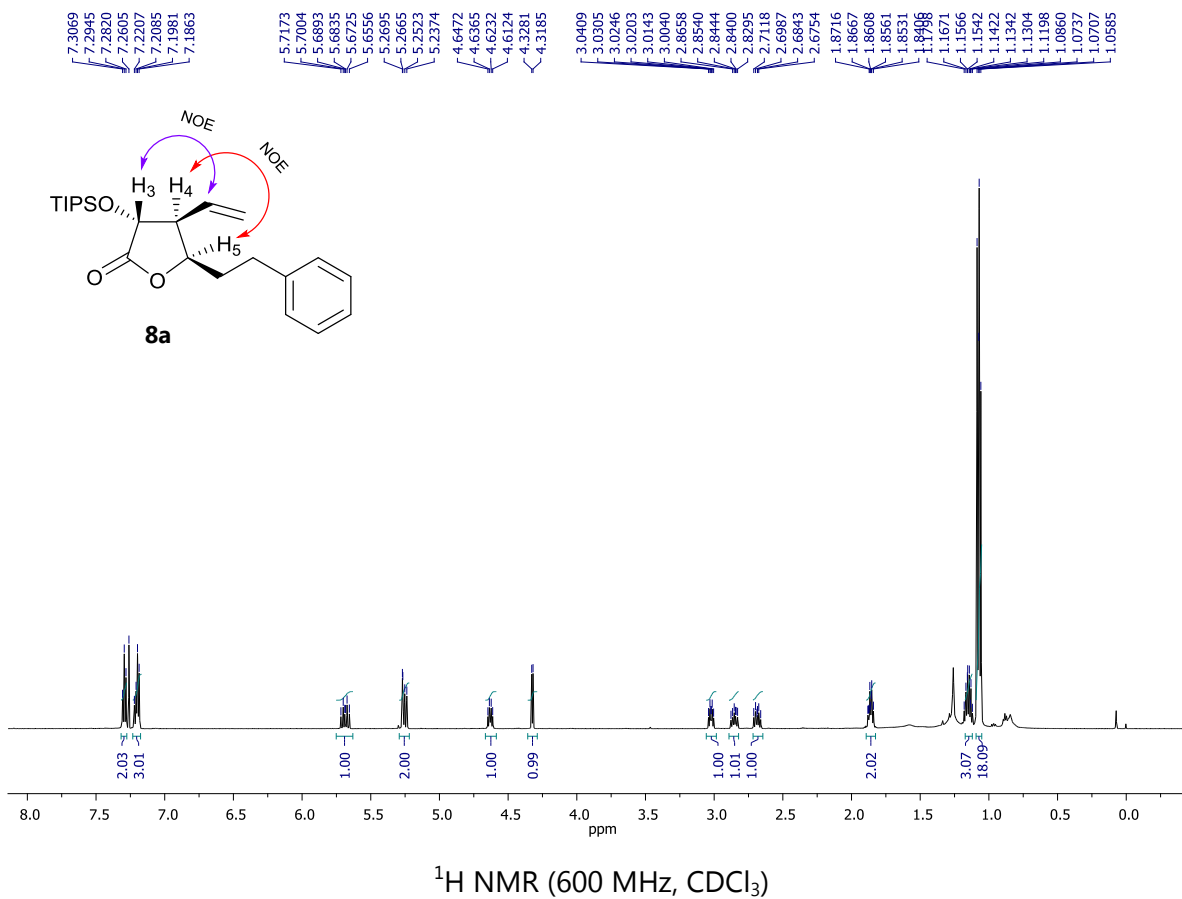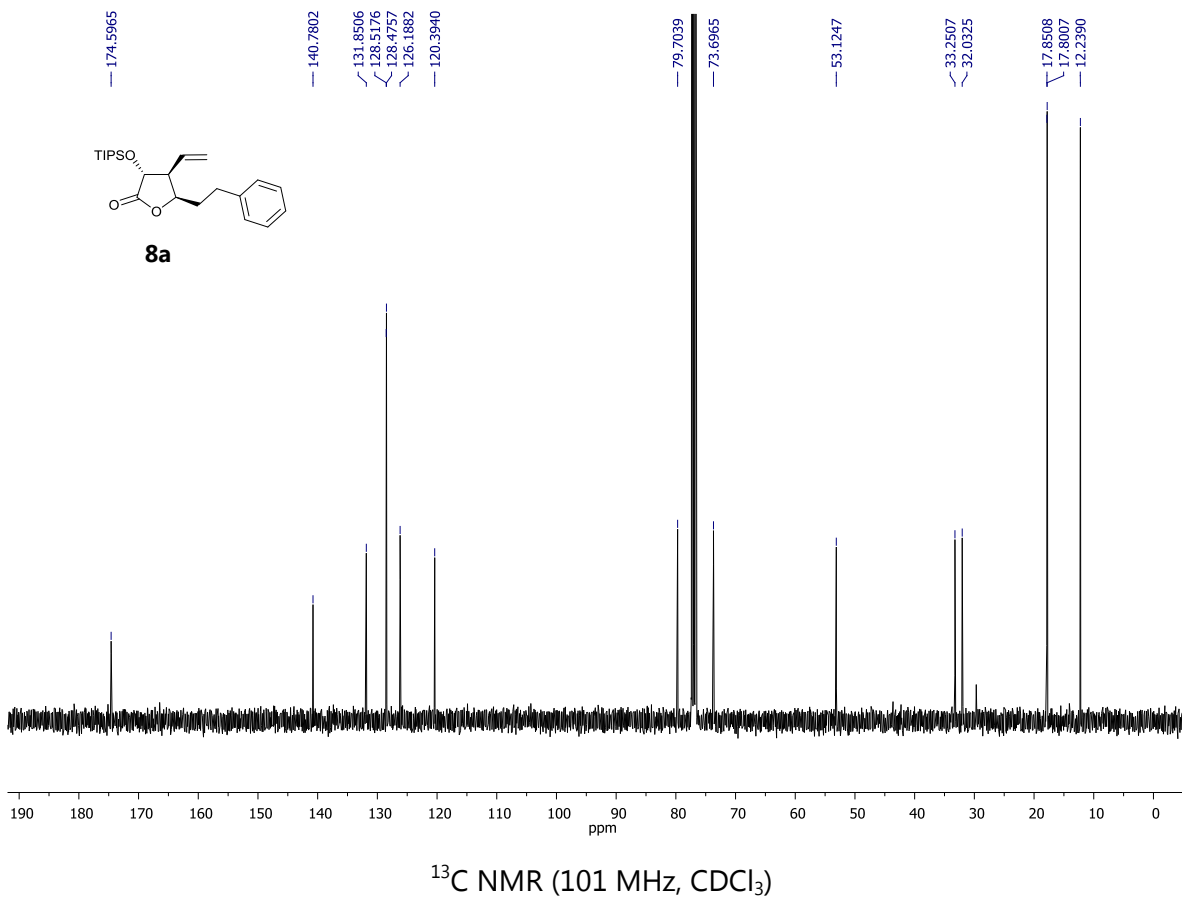

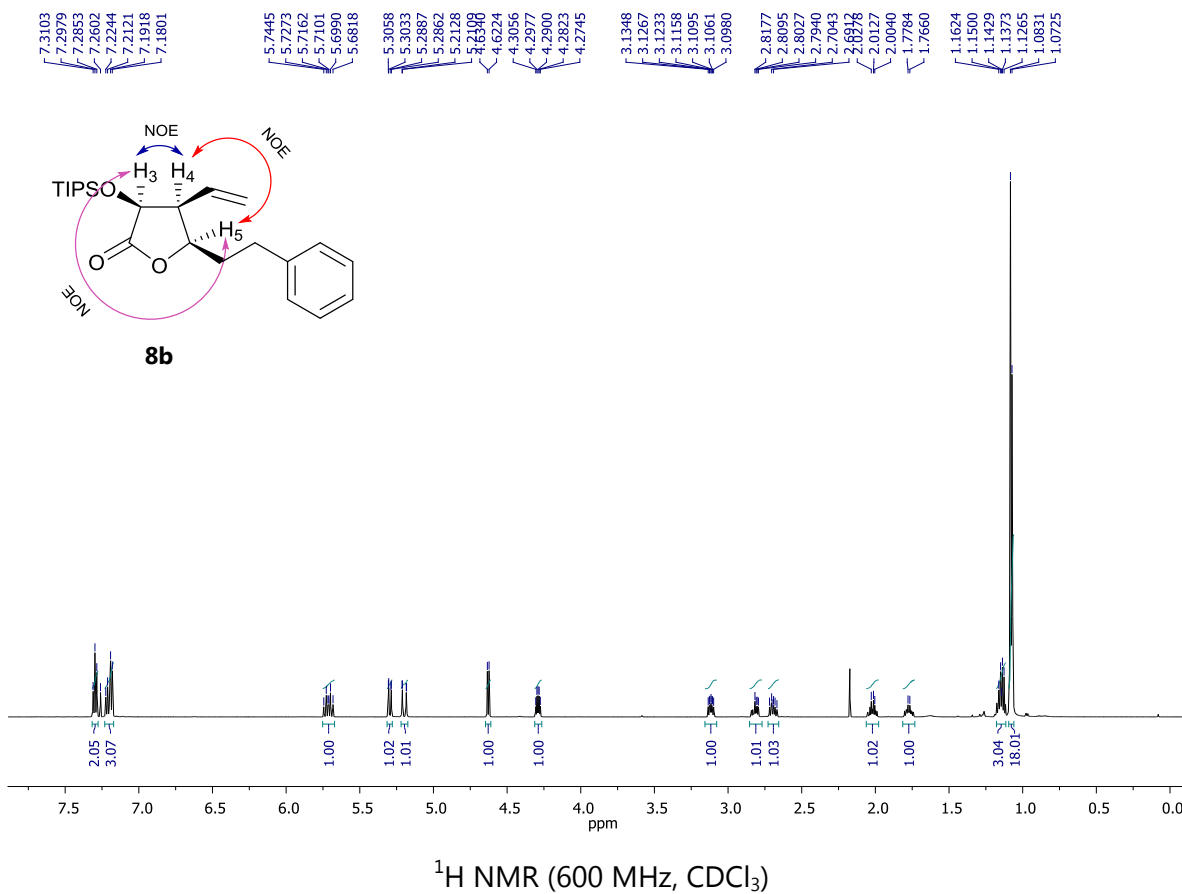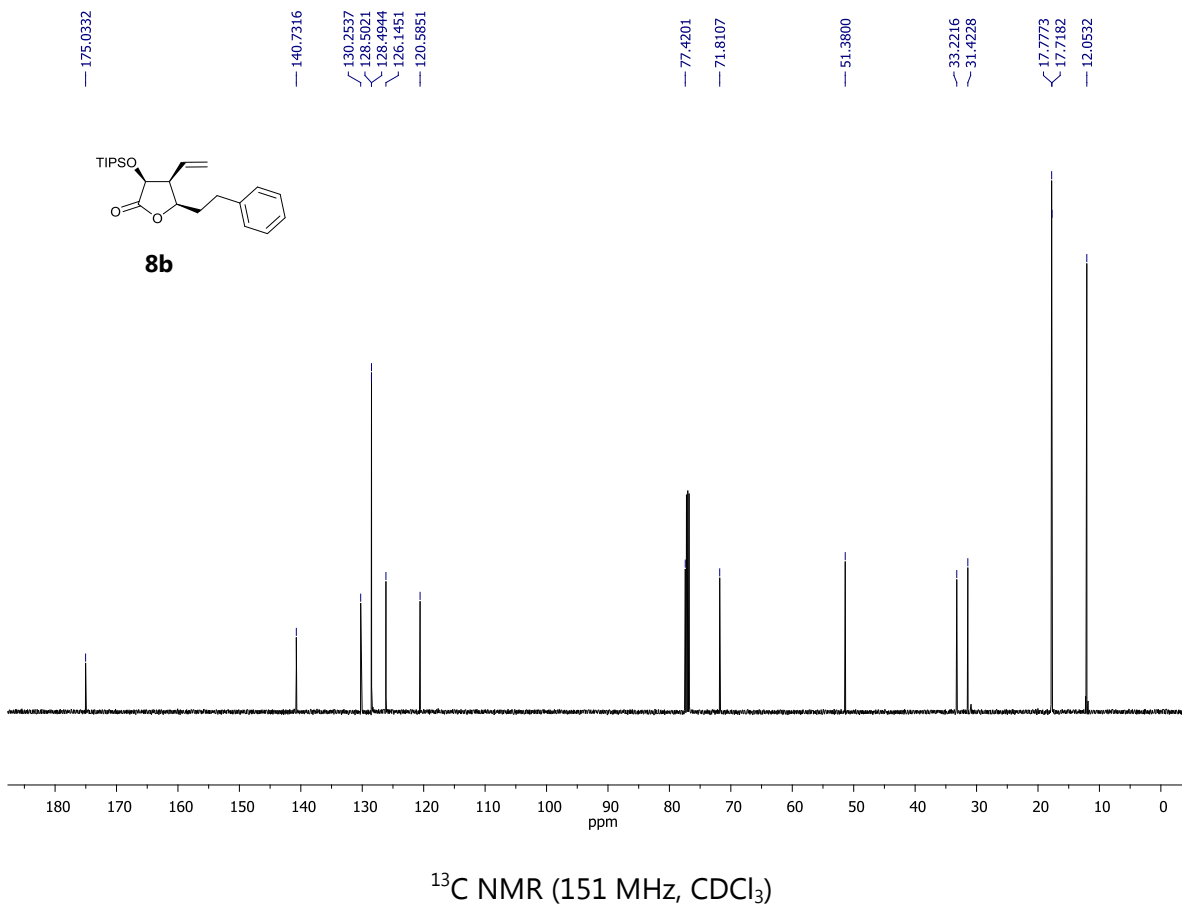

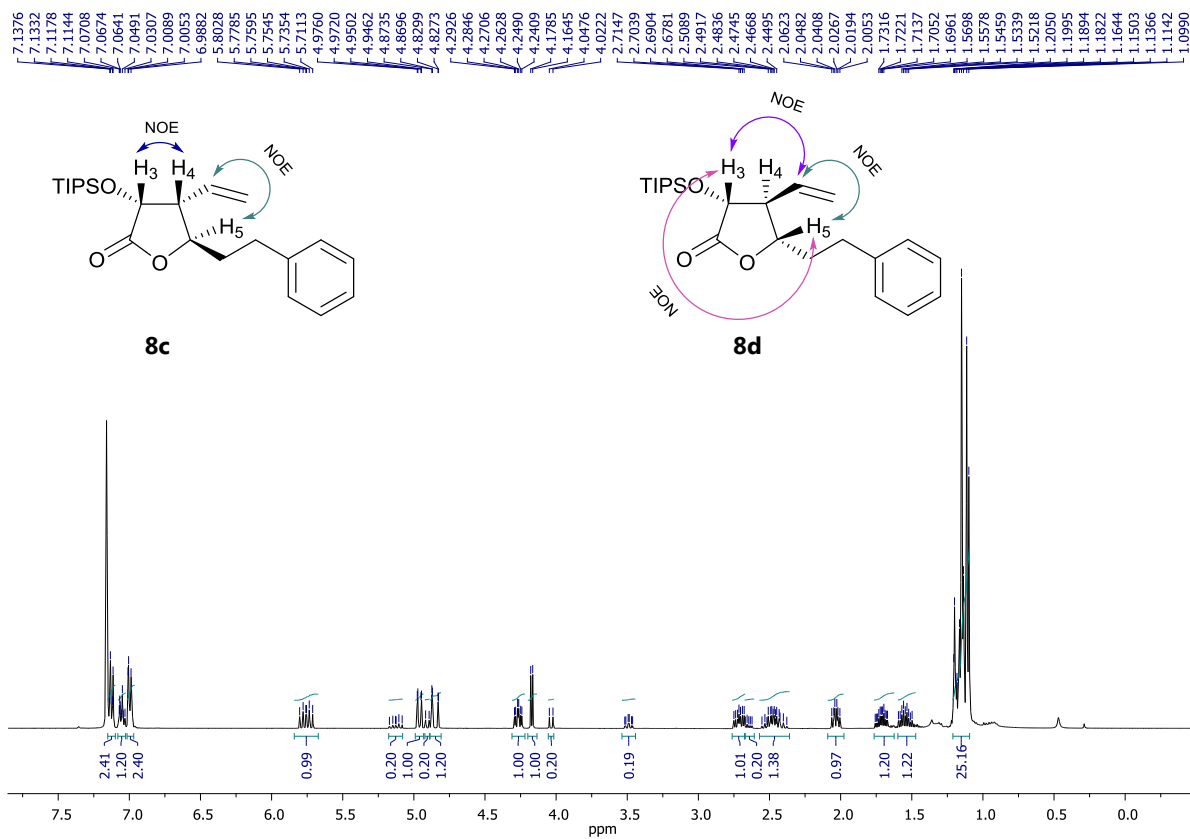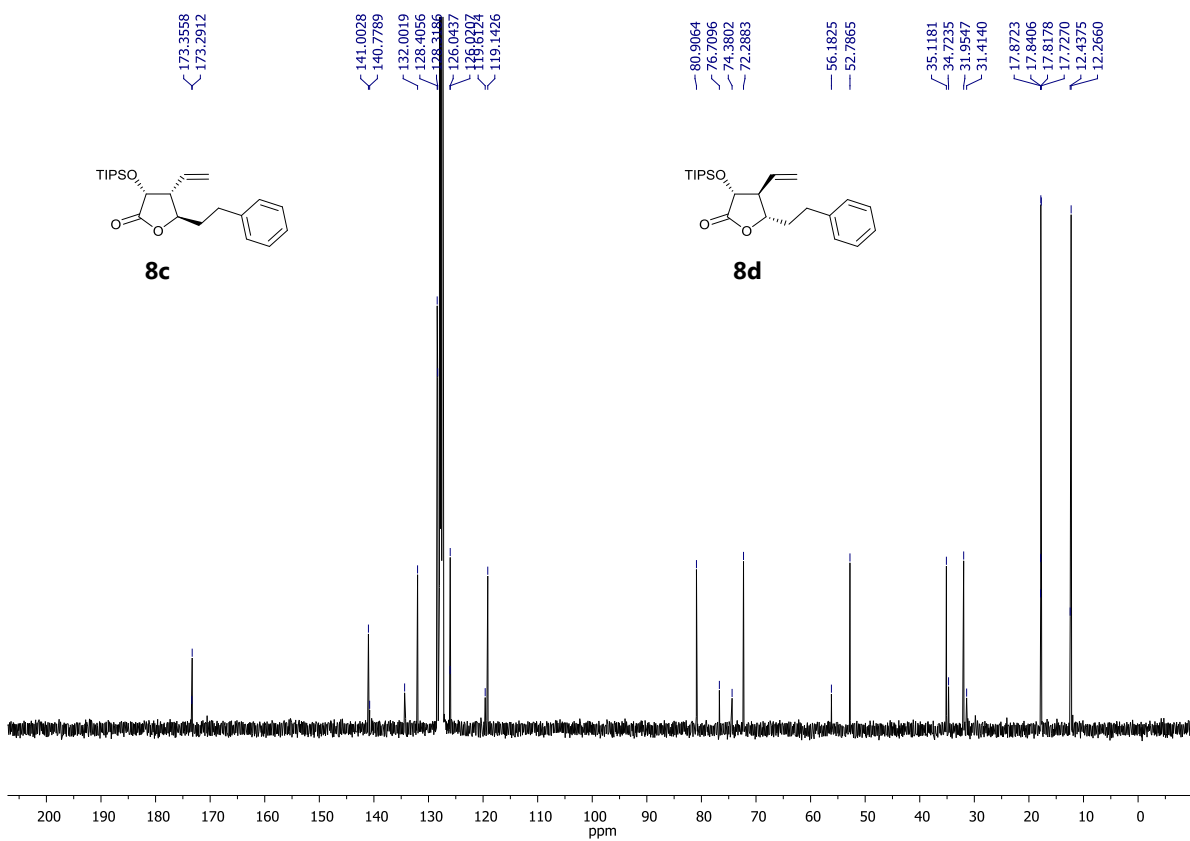

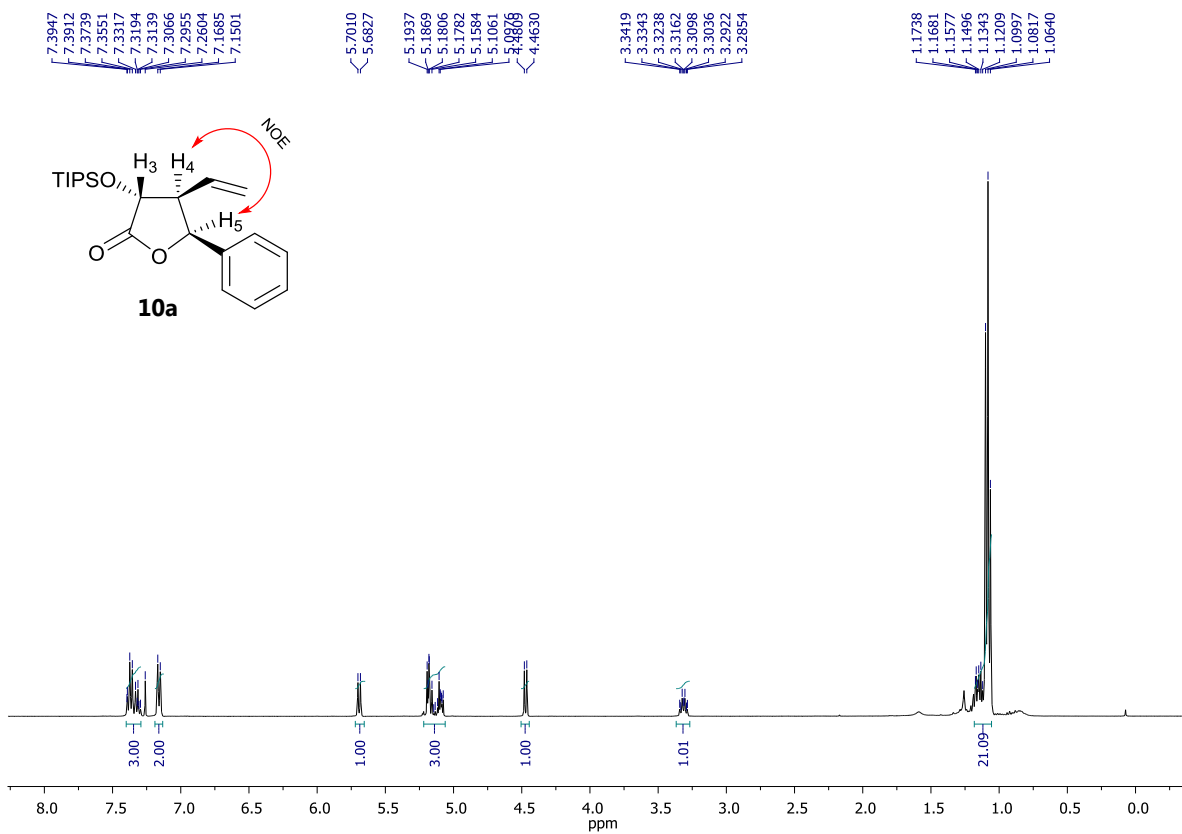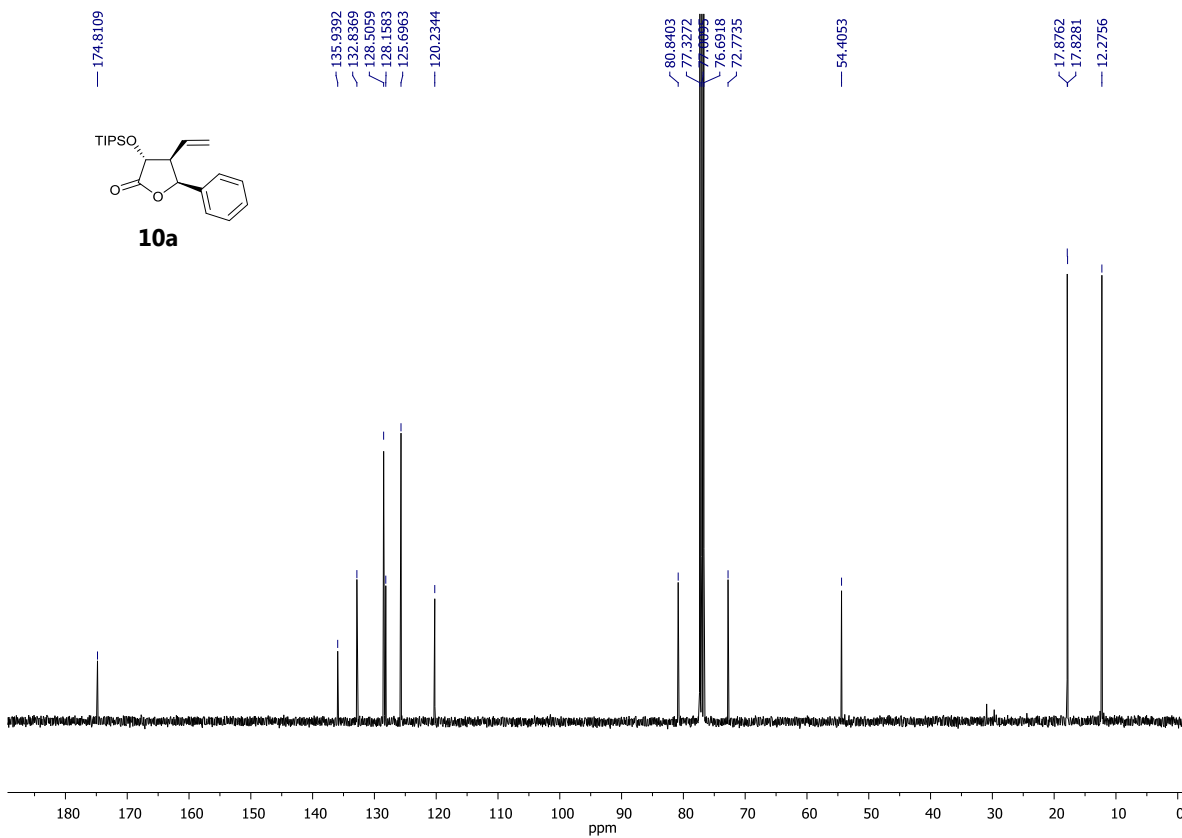

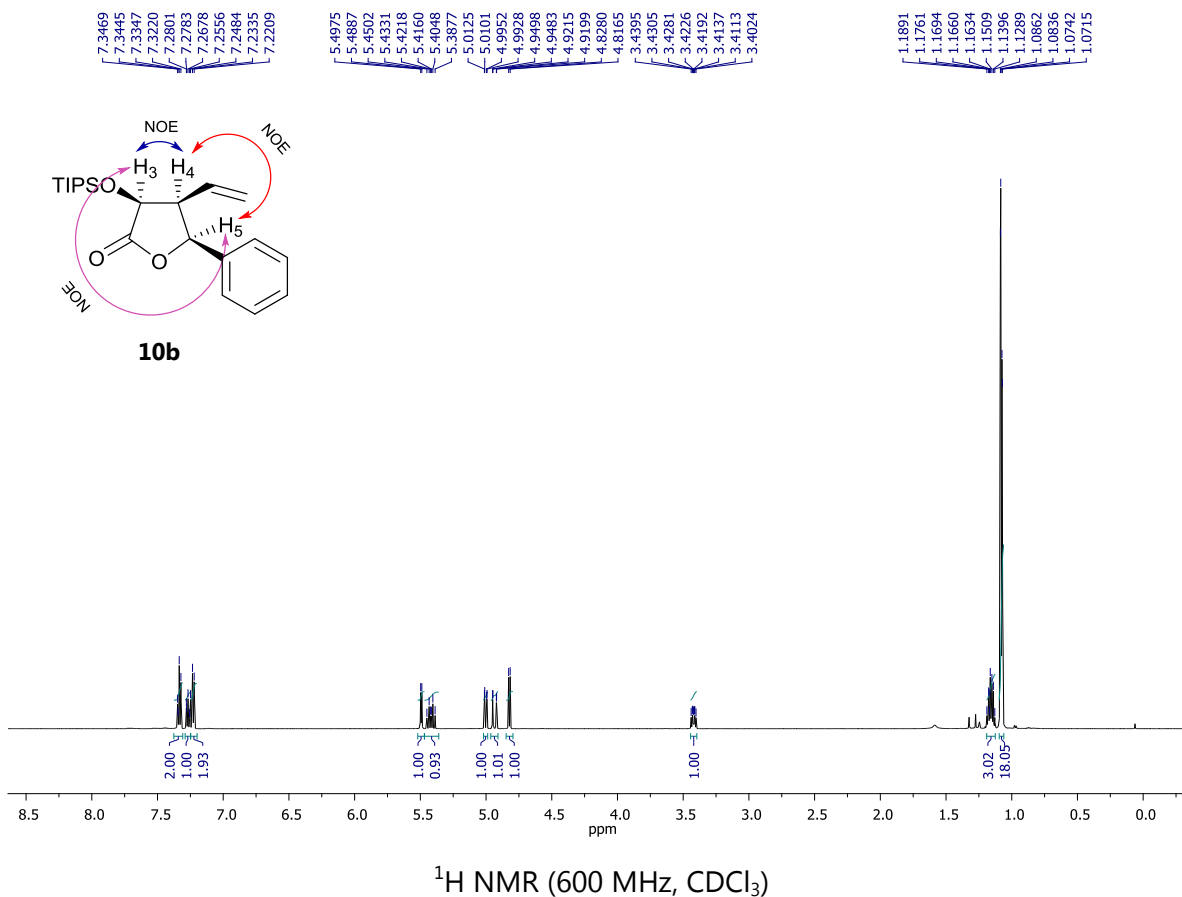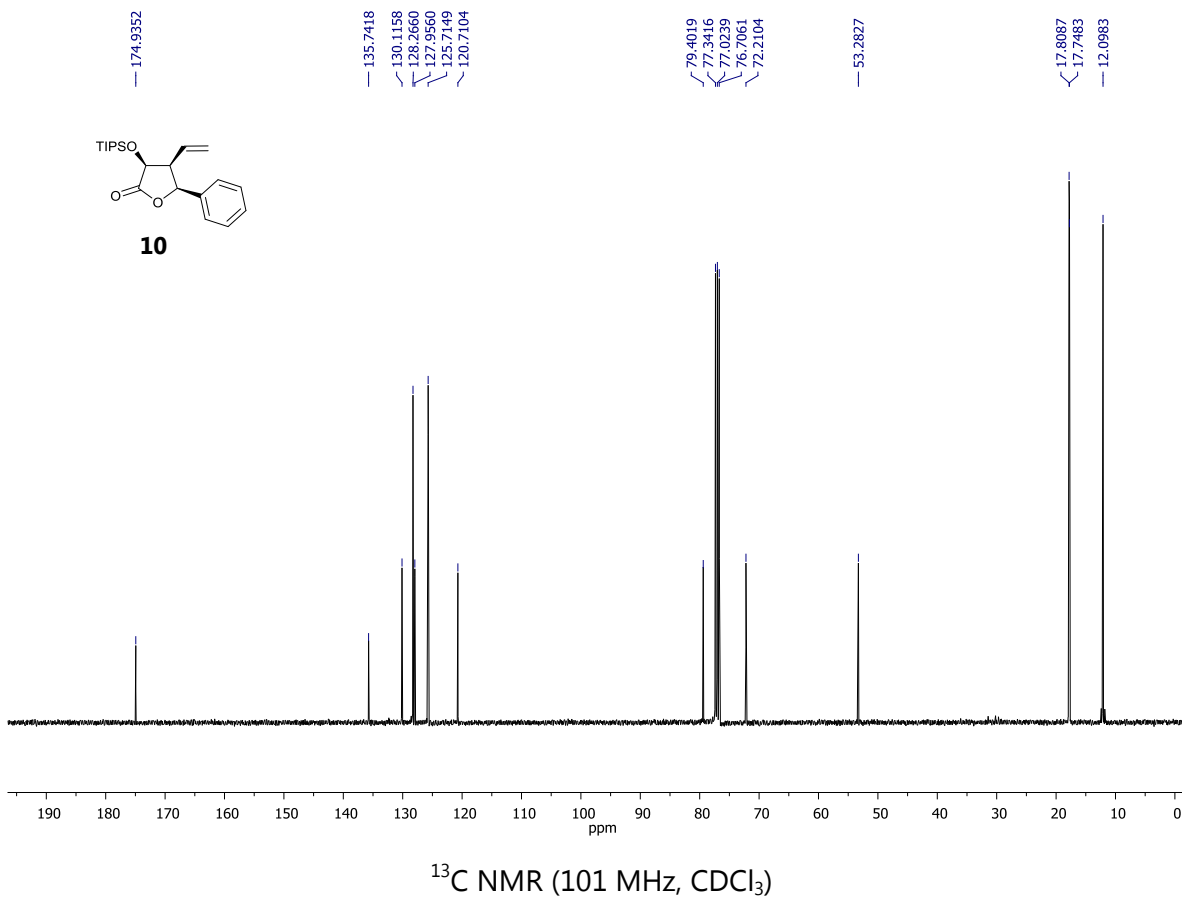

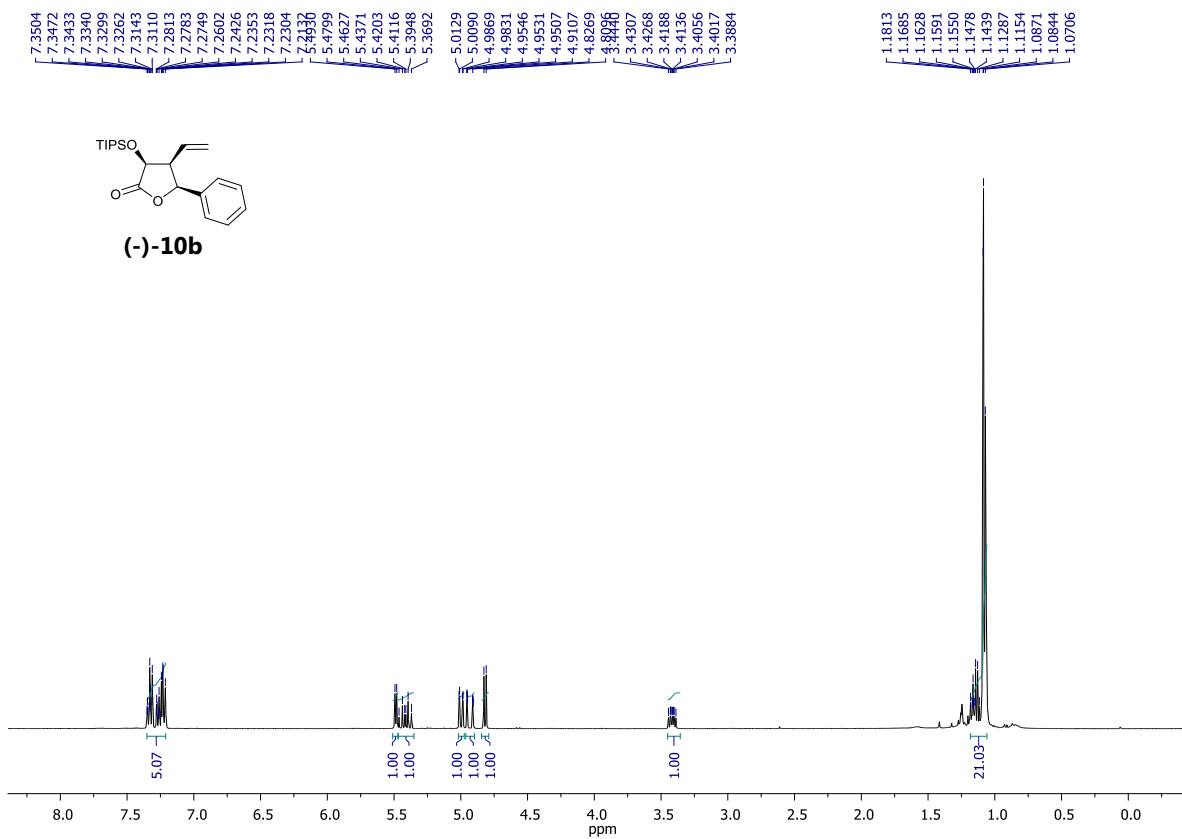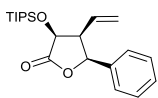

**(-)-10b**

$^1\text{H}$  NMR (400 MHz,  $\text{CDCl}_3$ )



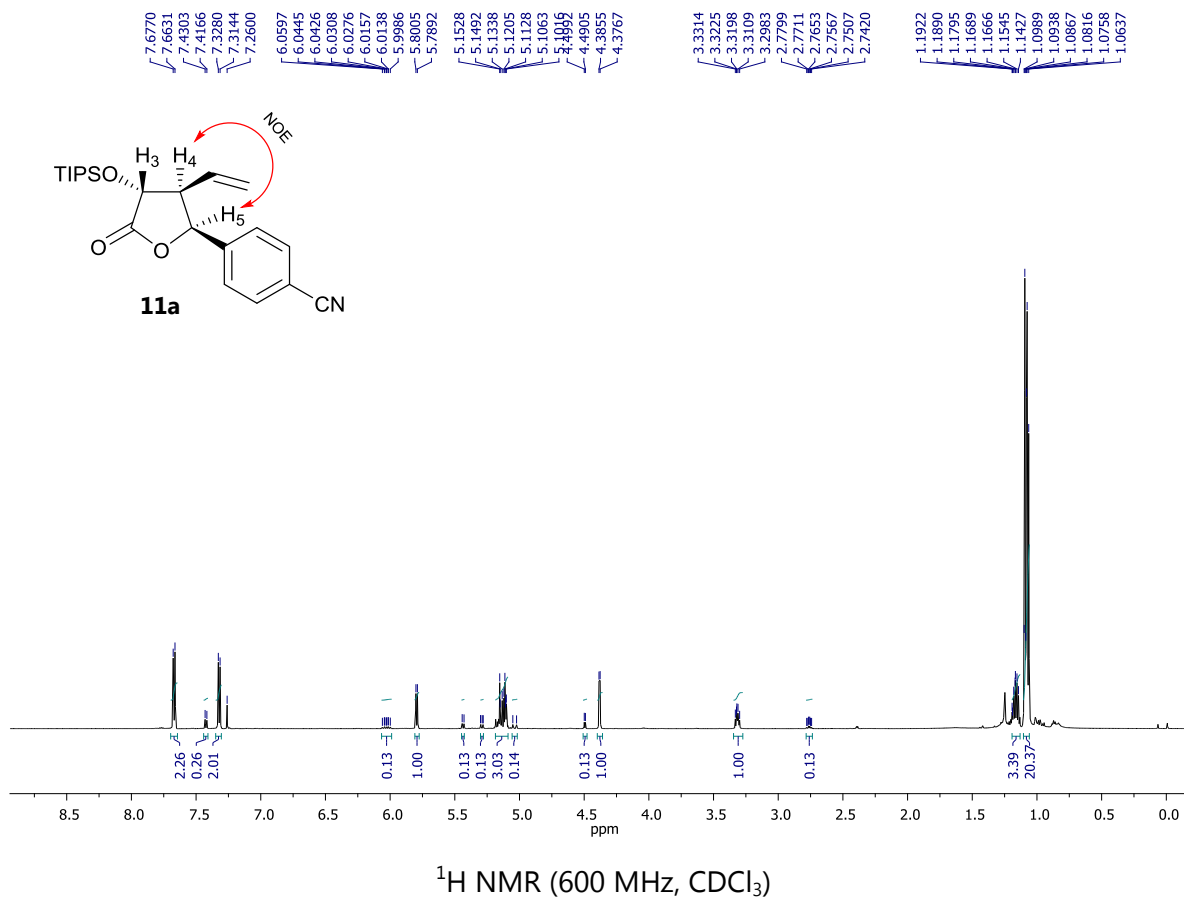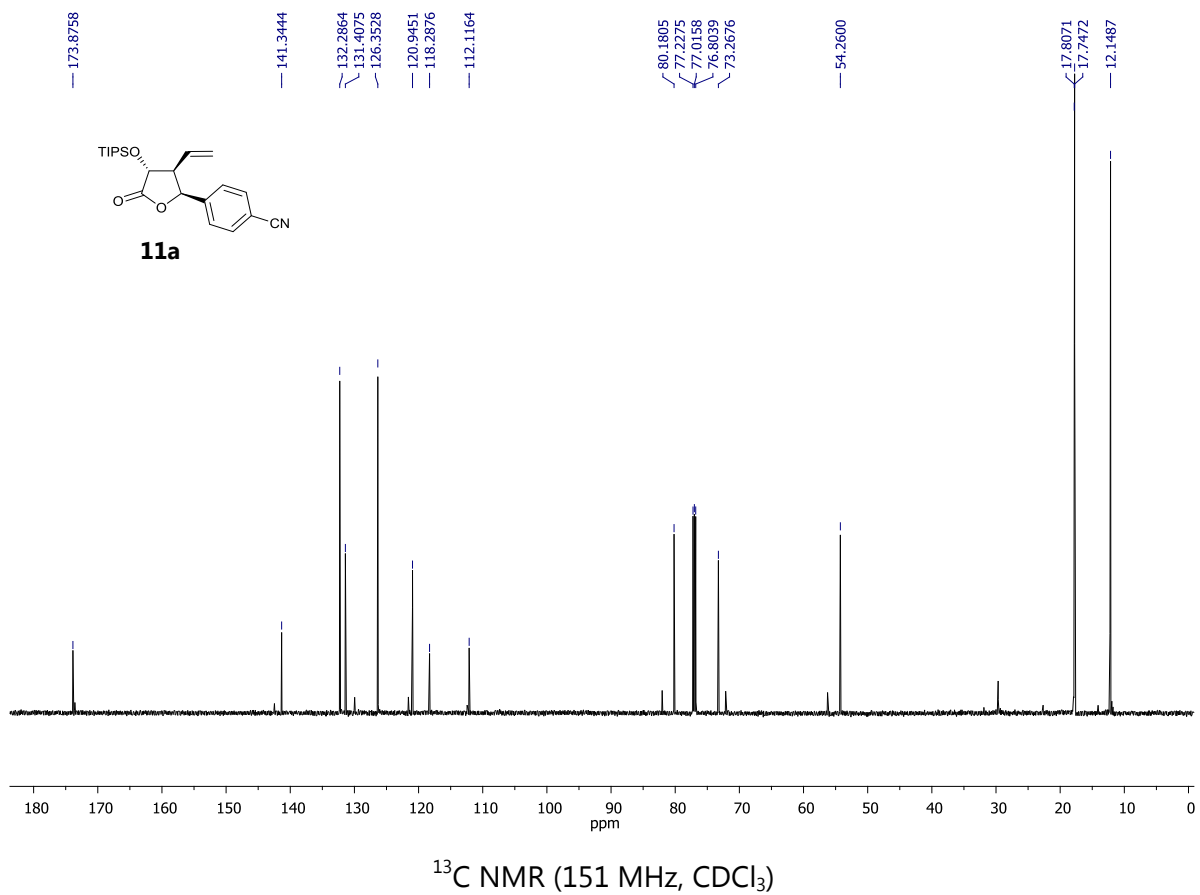

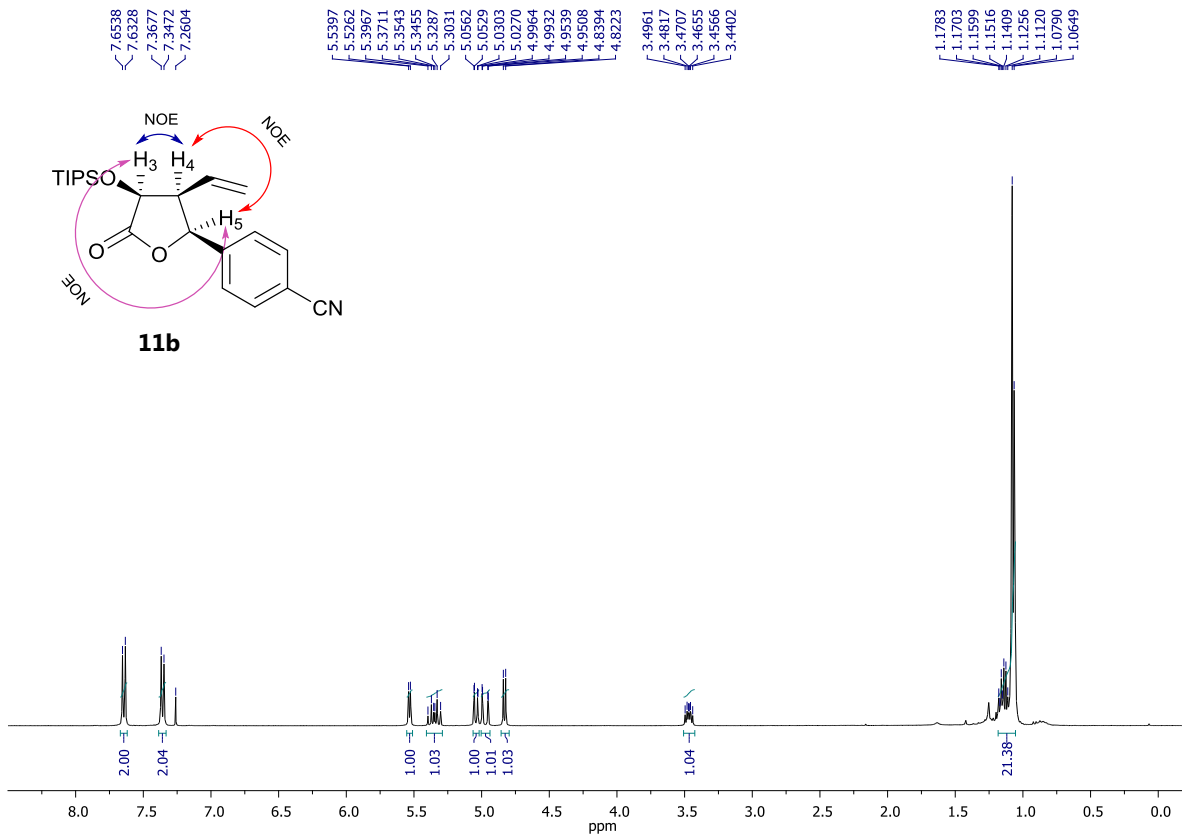

<sup>1</sup>H NMR (400 MHz, CDCl<sub>3</sub>)

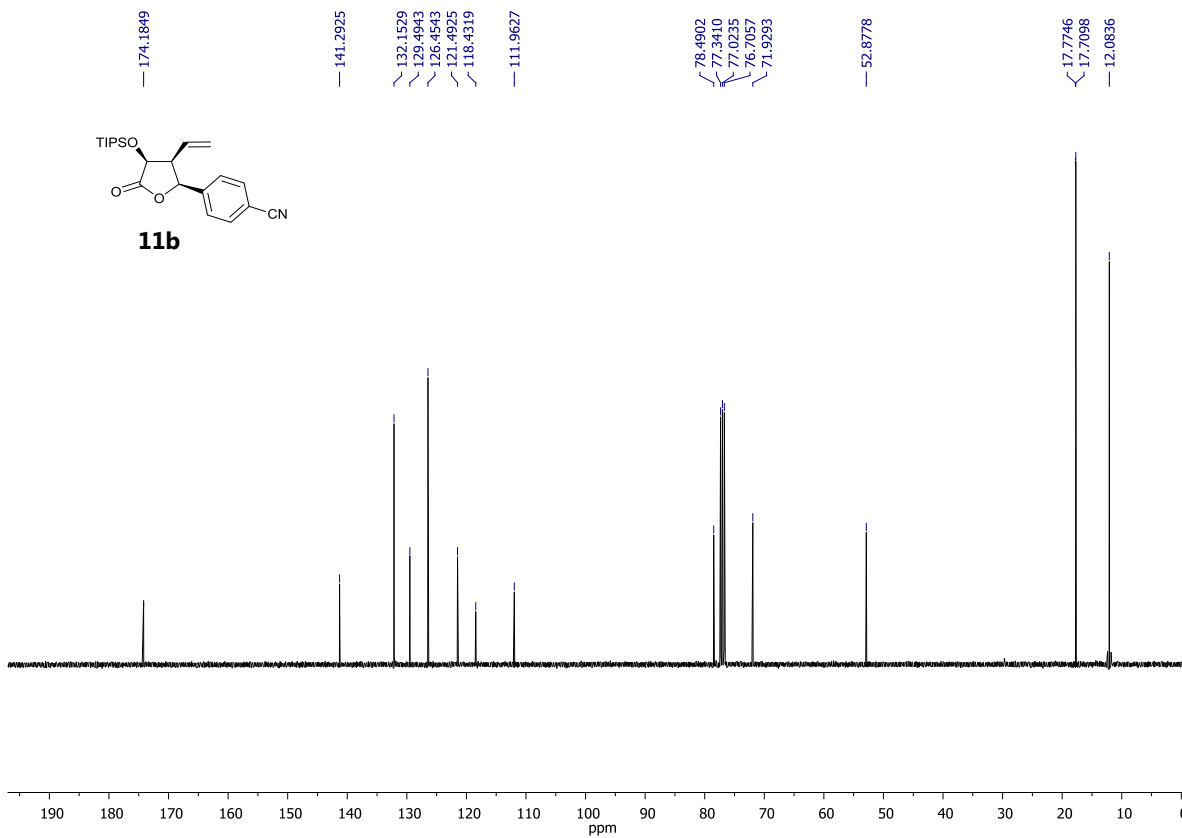

<sup>13</sup>C NMR (101 MHz, CDCl<sub>3</sub>)

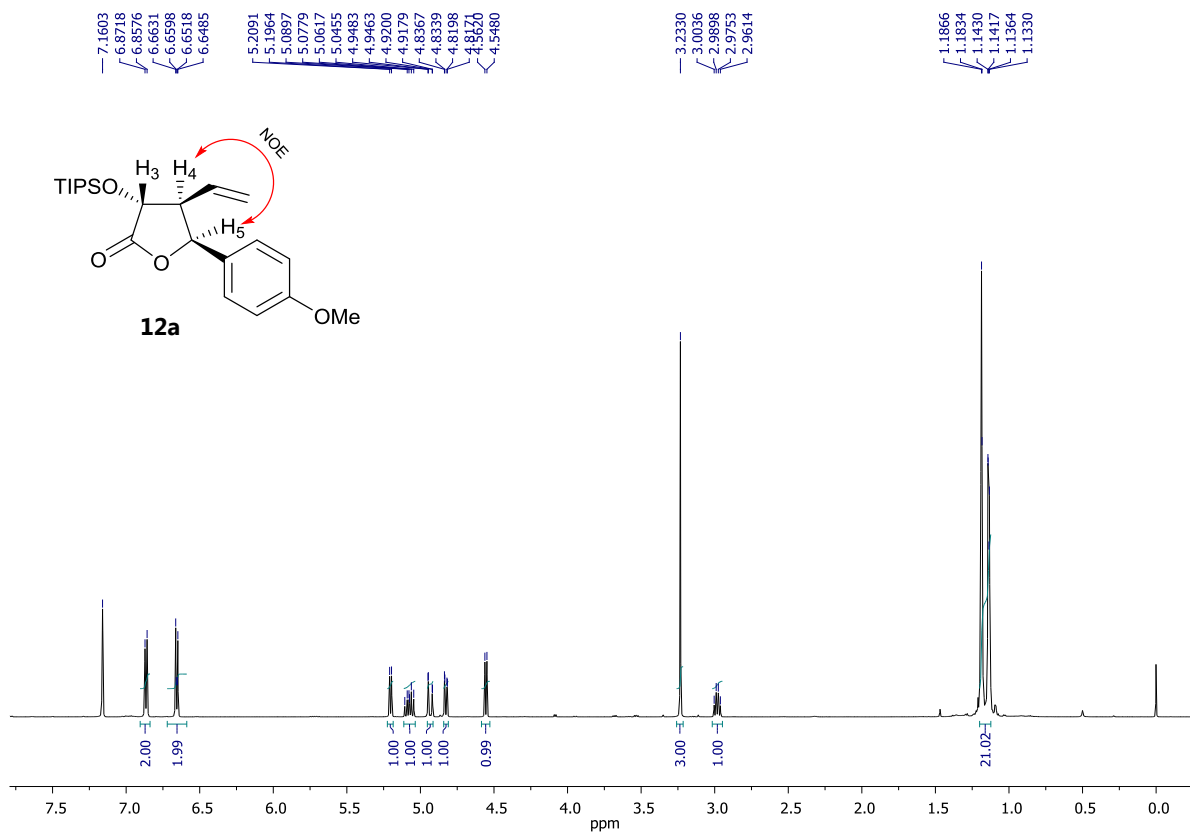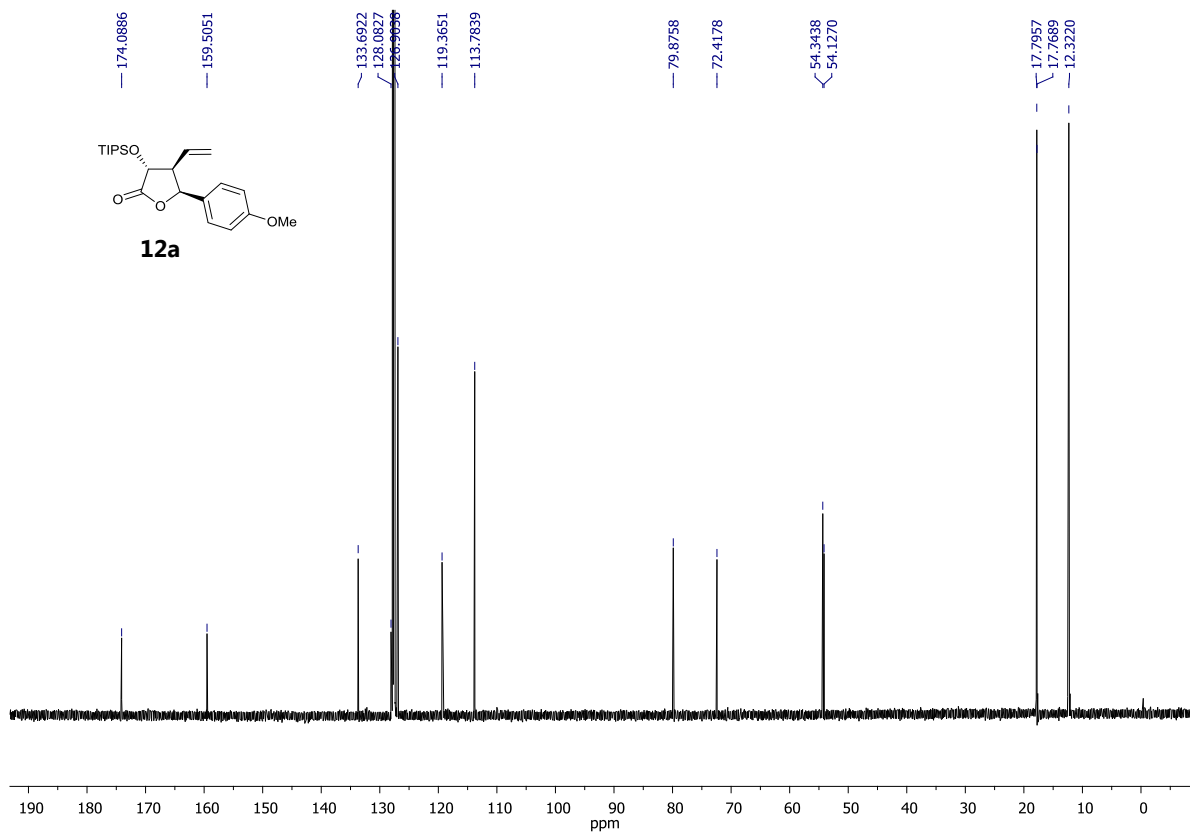

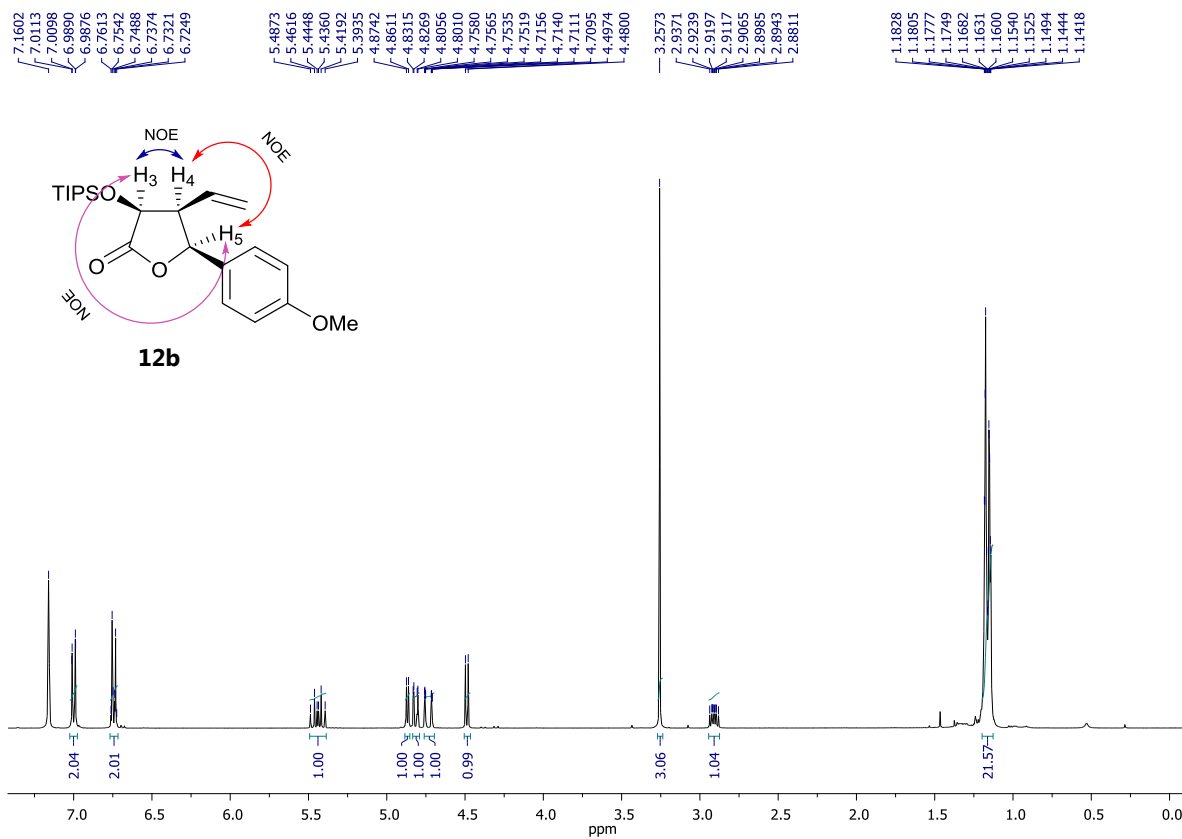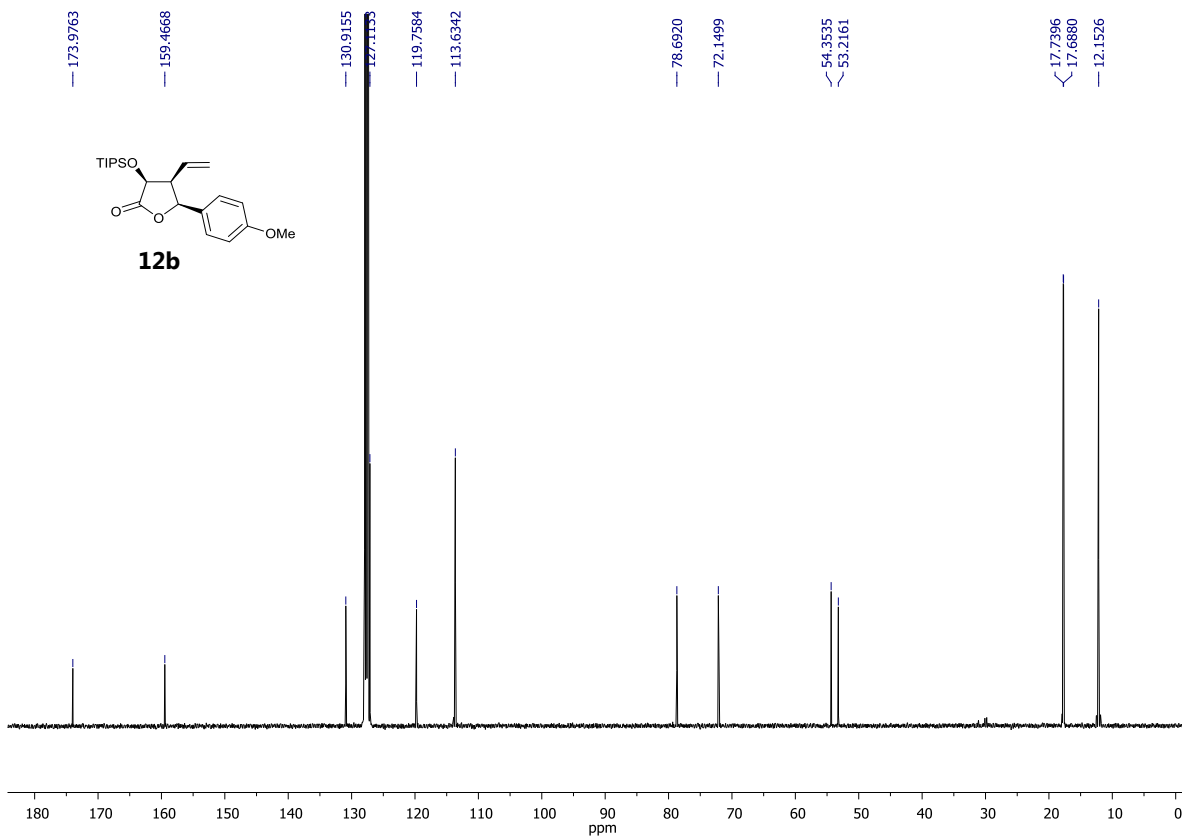

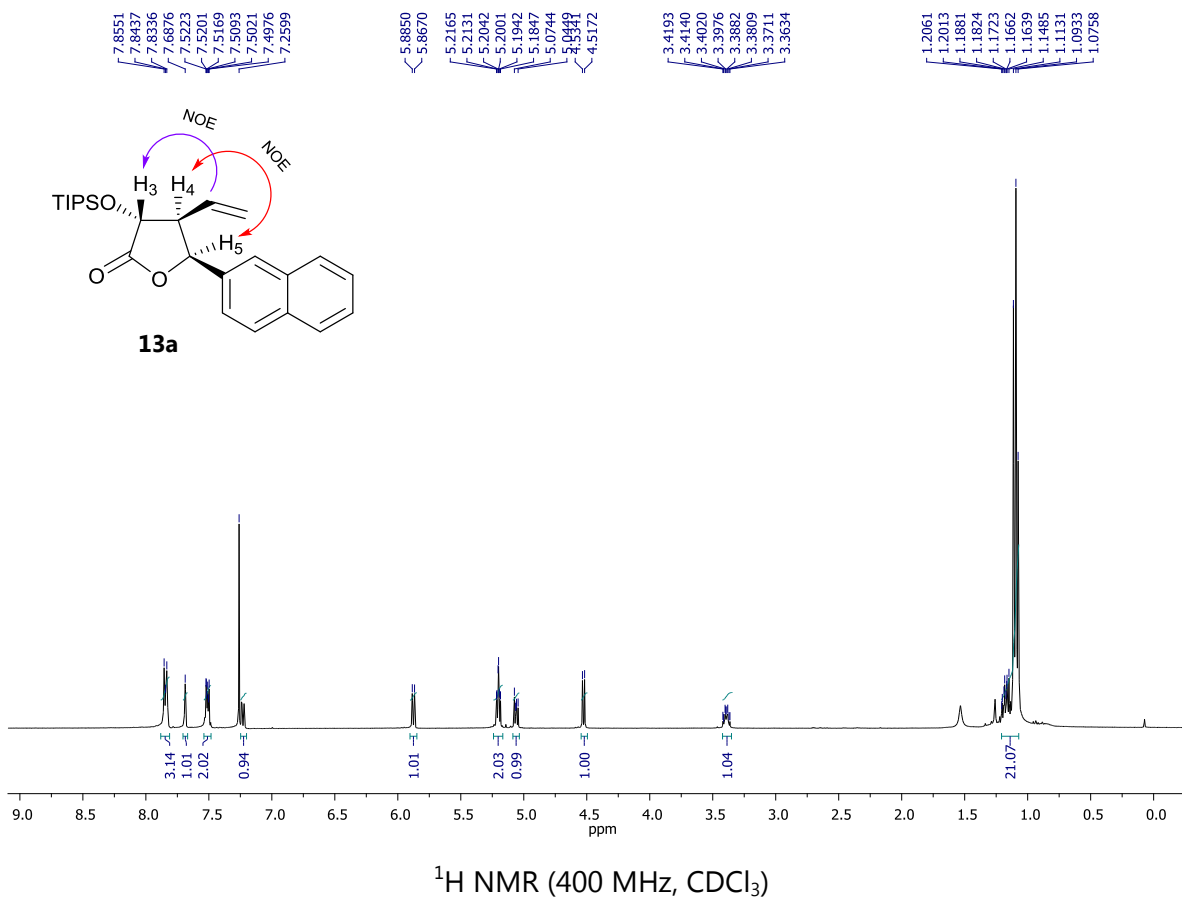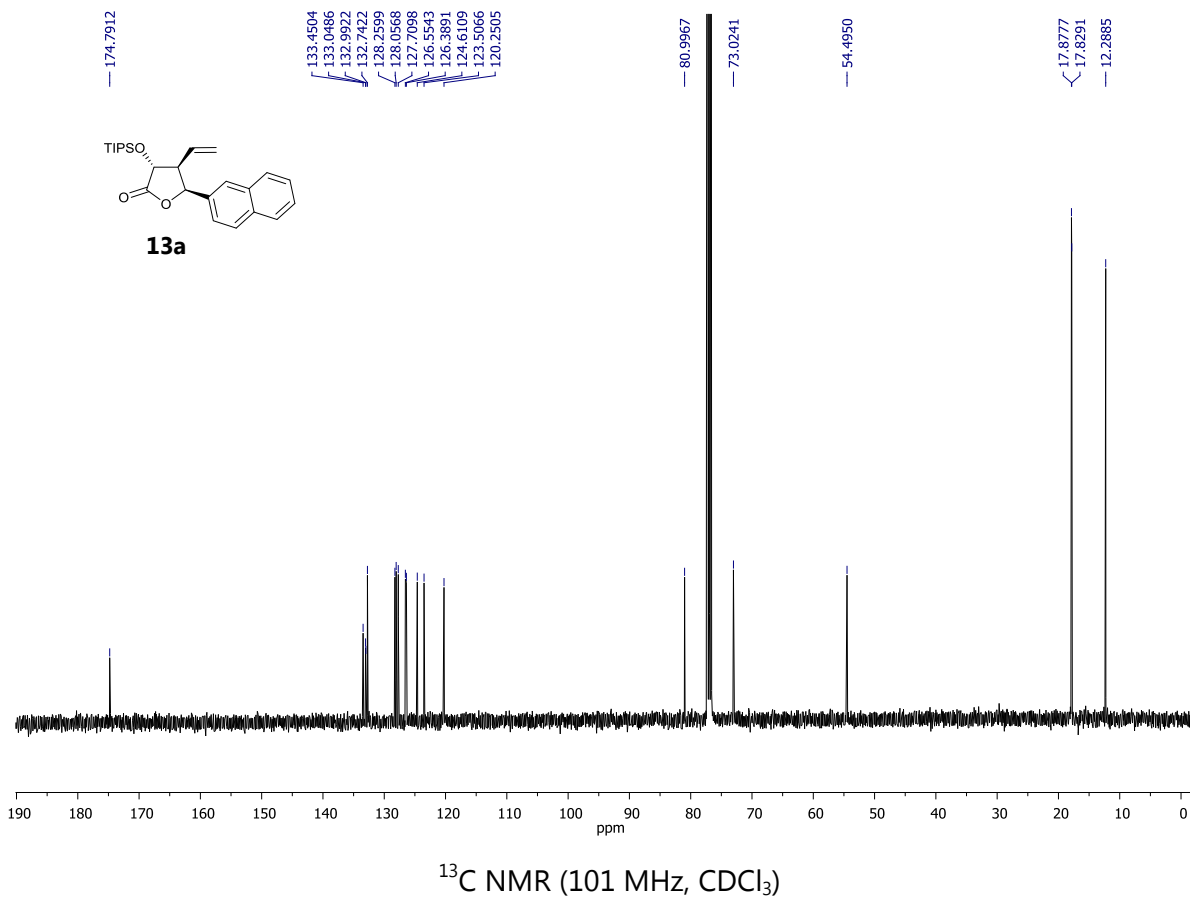

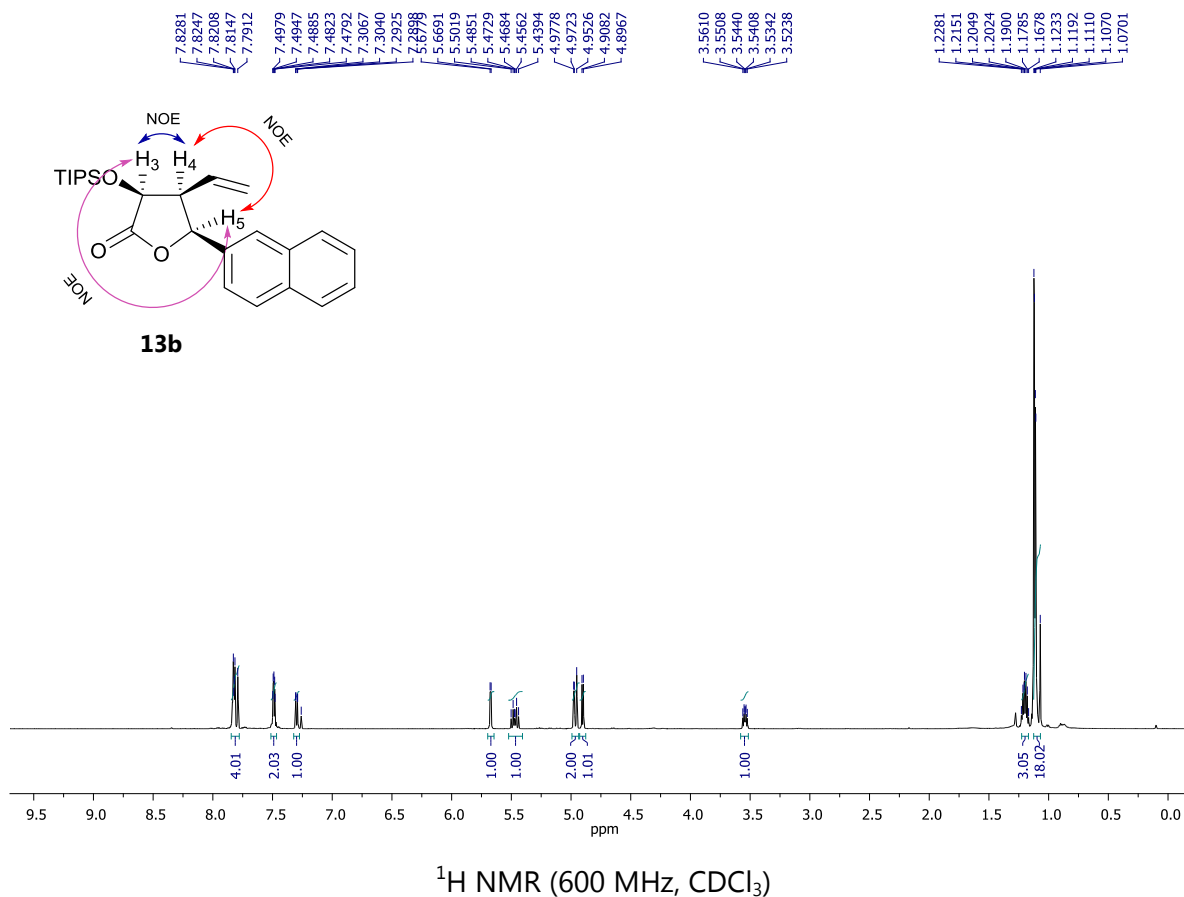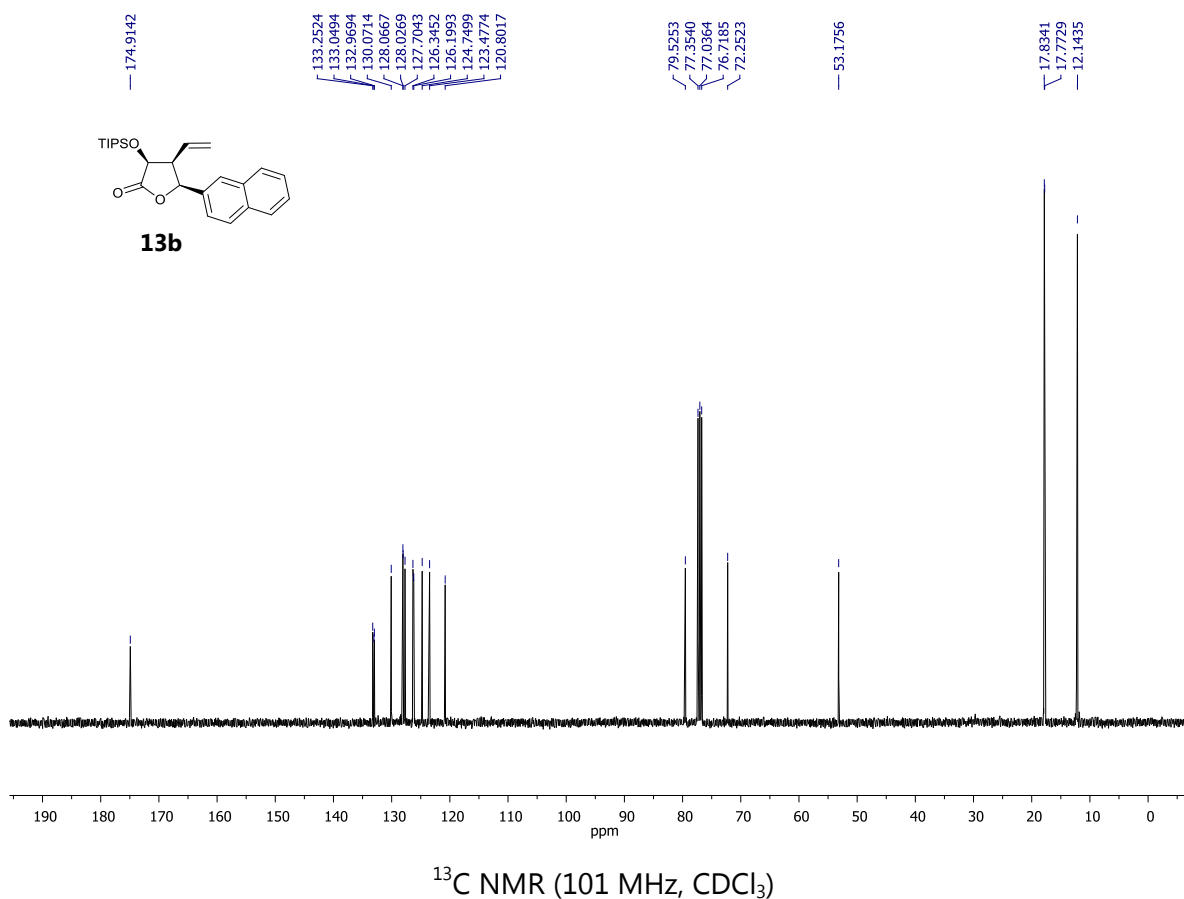

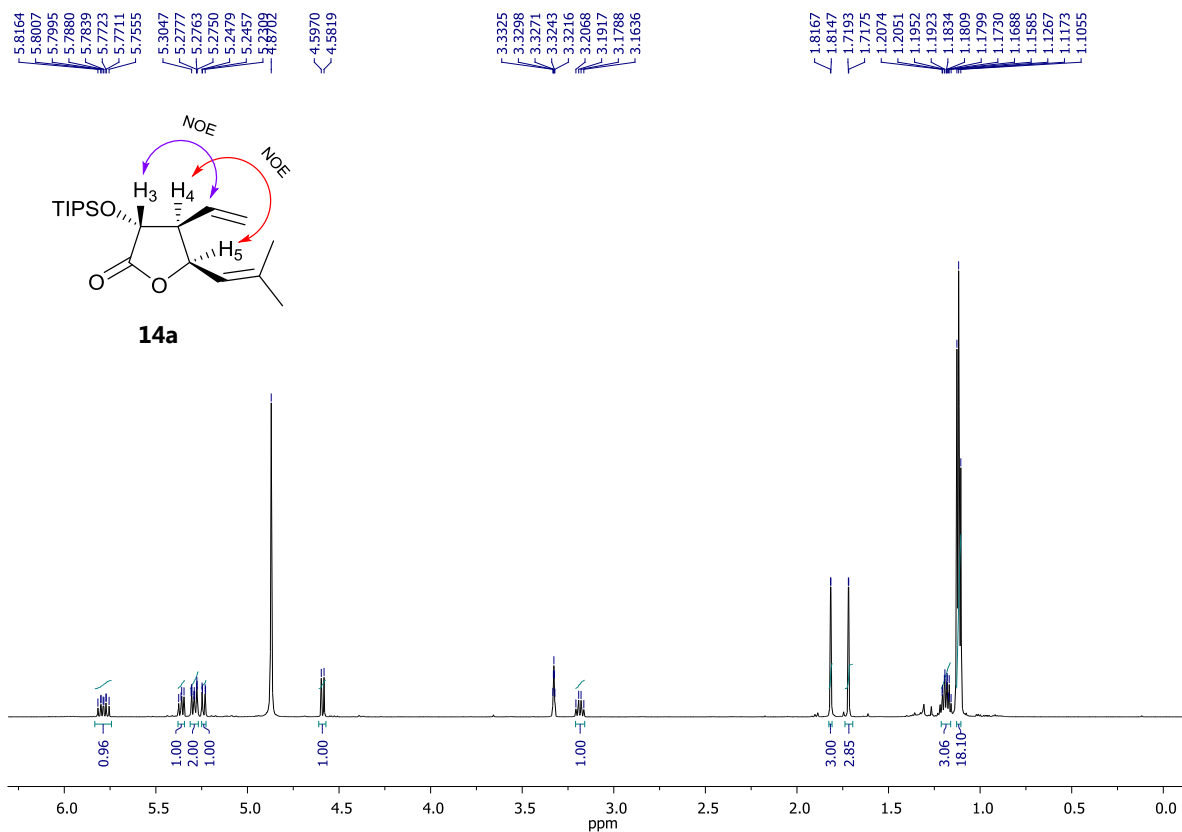

$^1\text{H}$  NMR (600 MHz,  $\text{CD}_3\text{OD}$ )

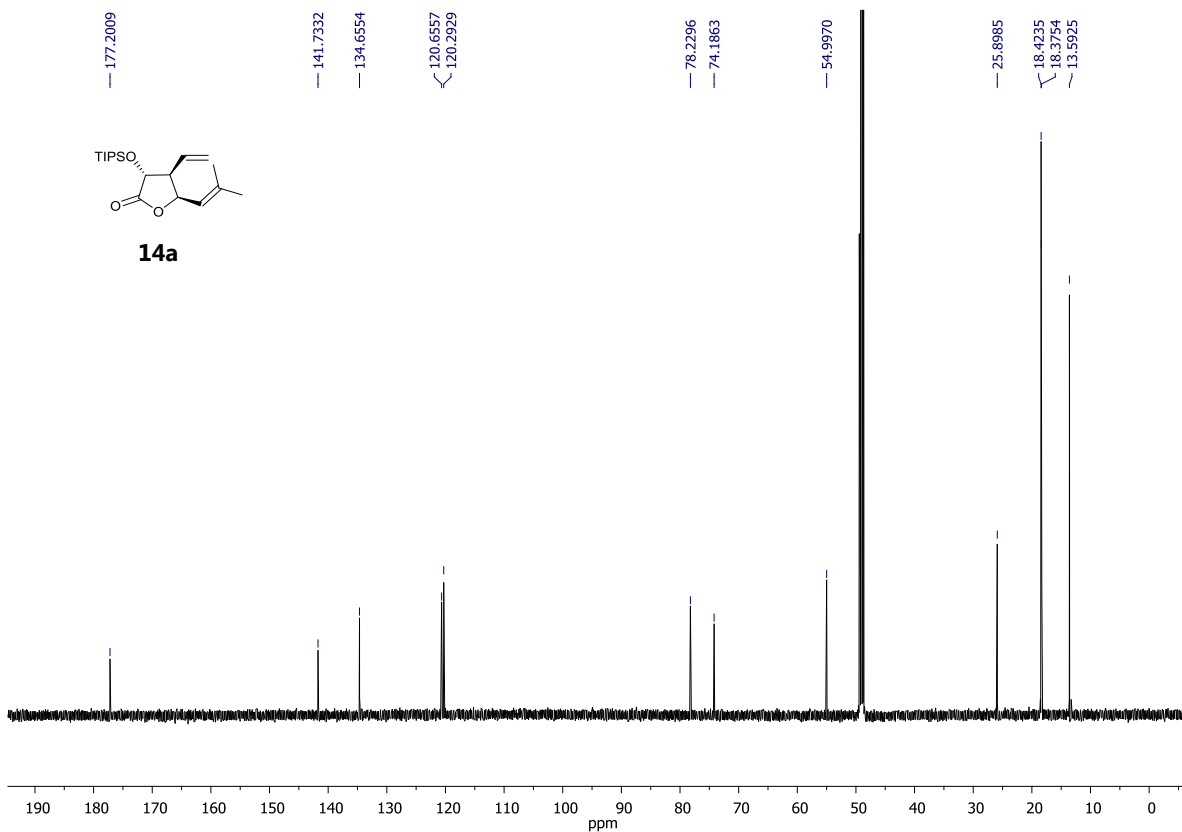

$^{13}\text{C}$  NMR (151 MHz,  $\text{CD}_3\text{OD}$ )

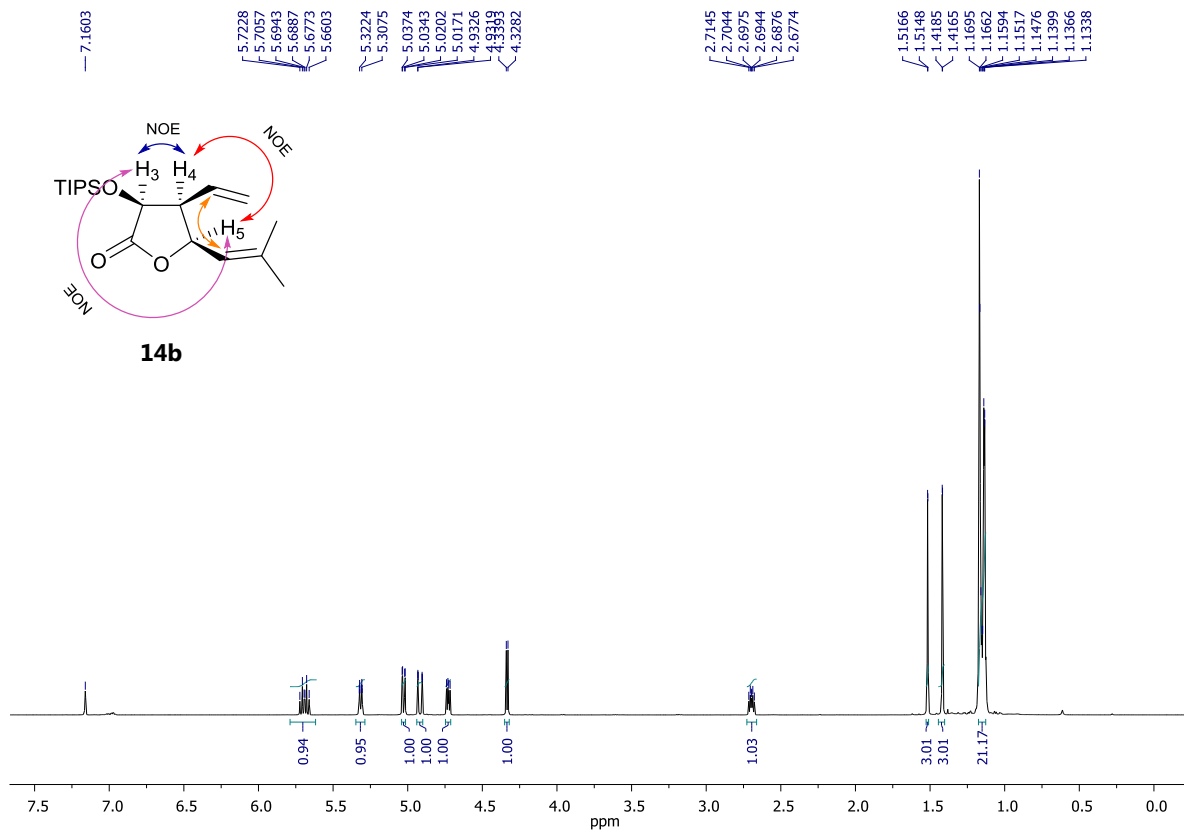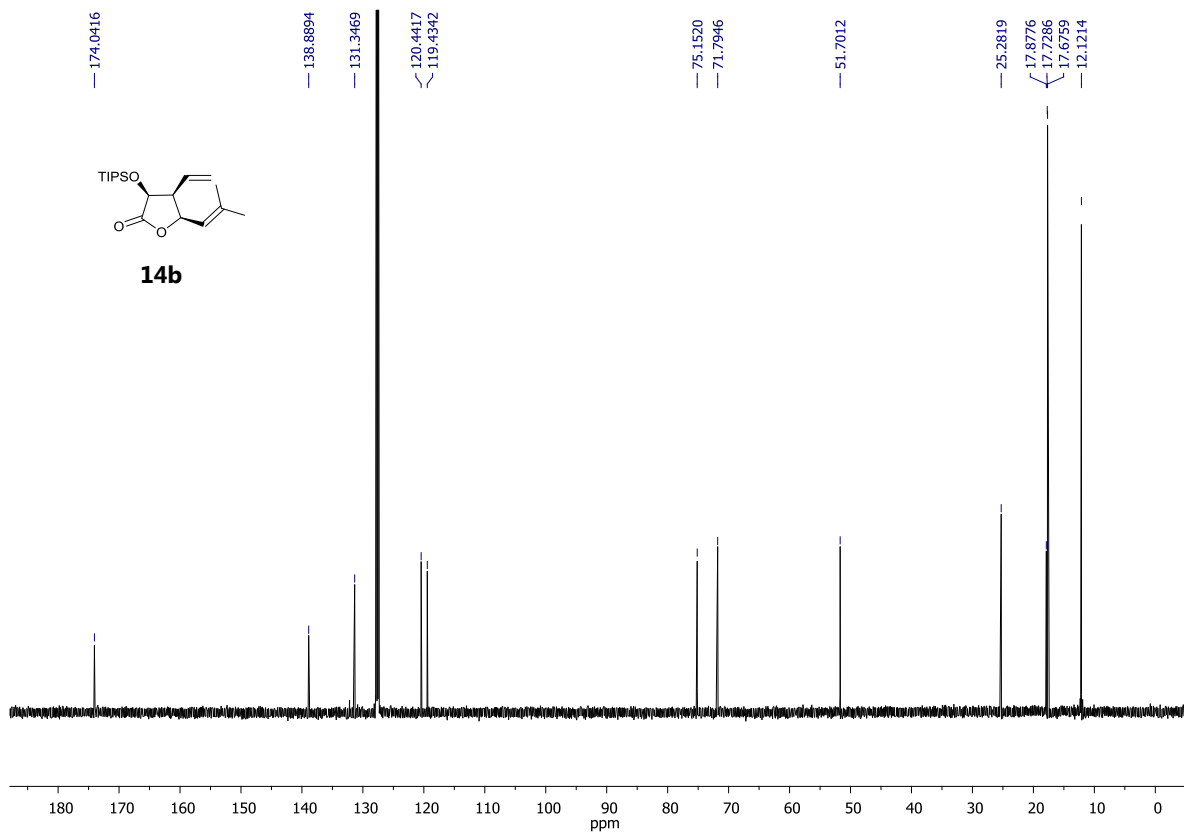



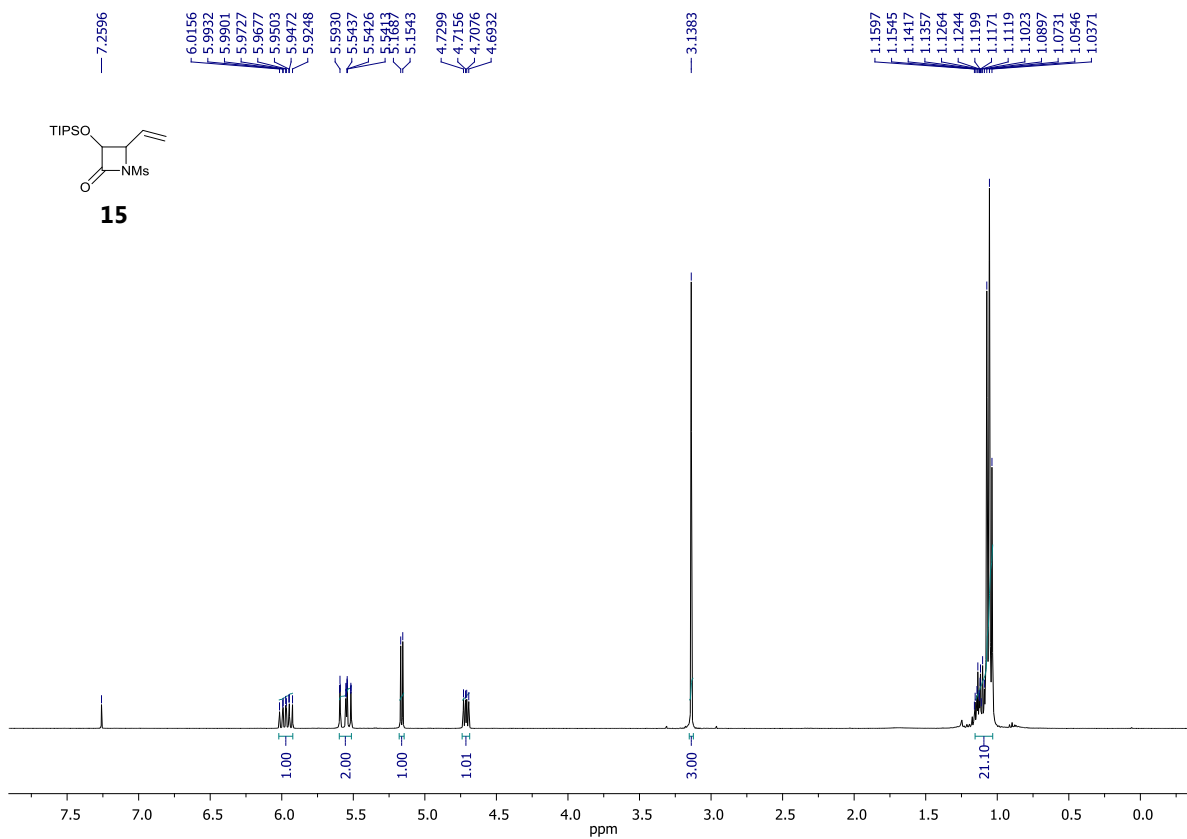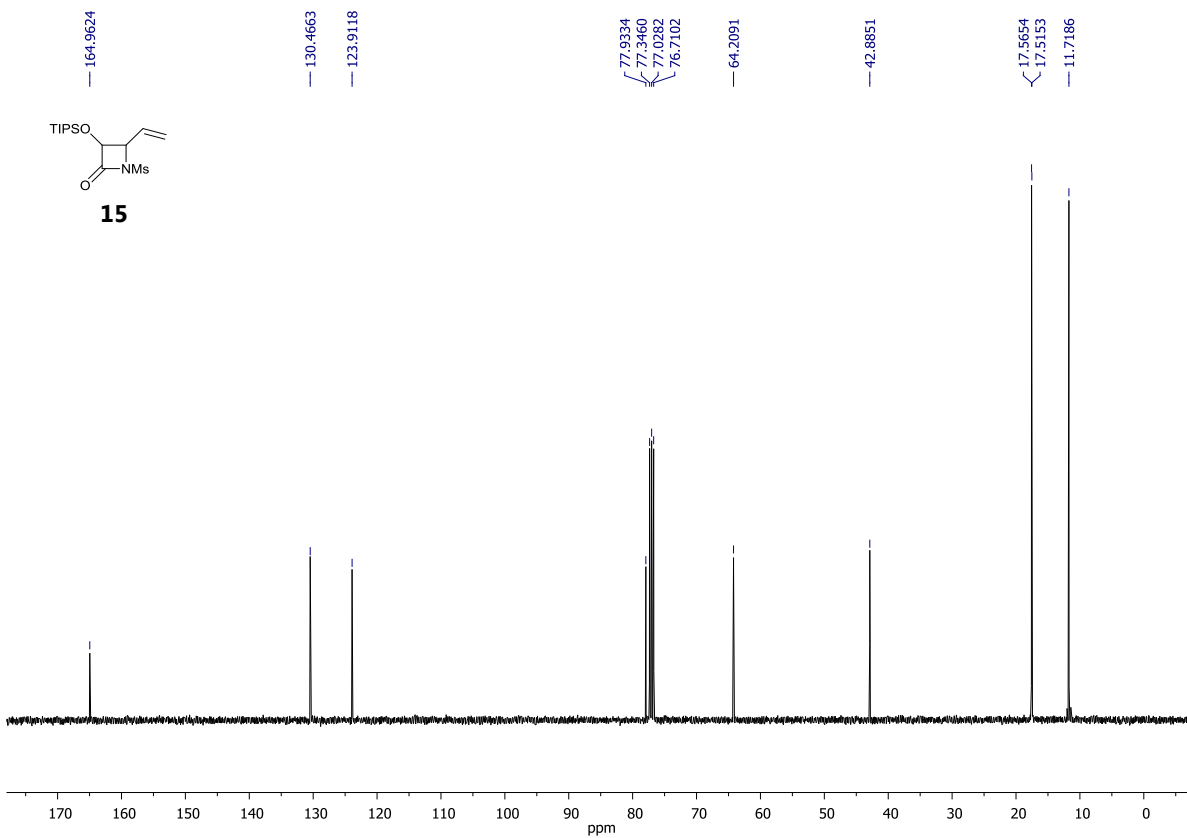

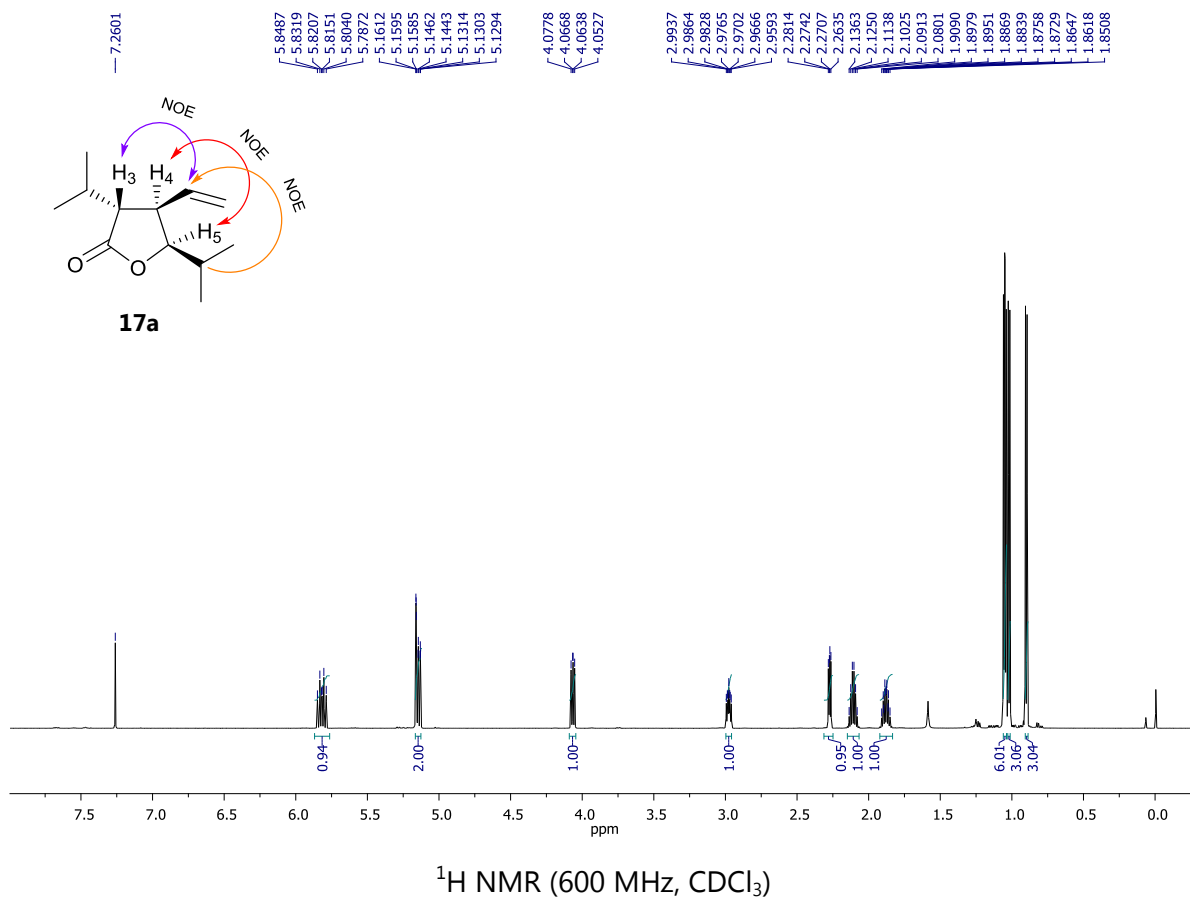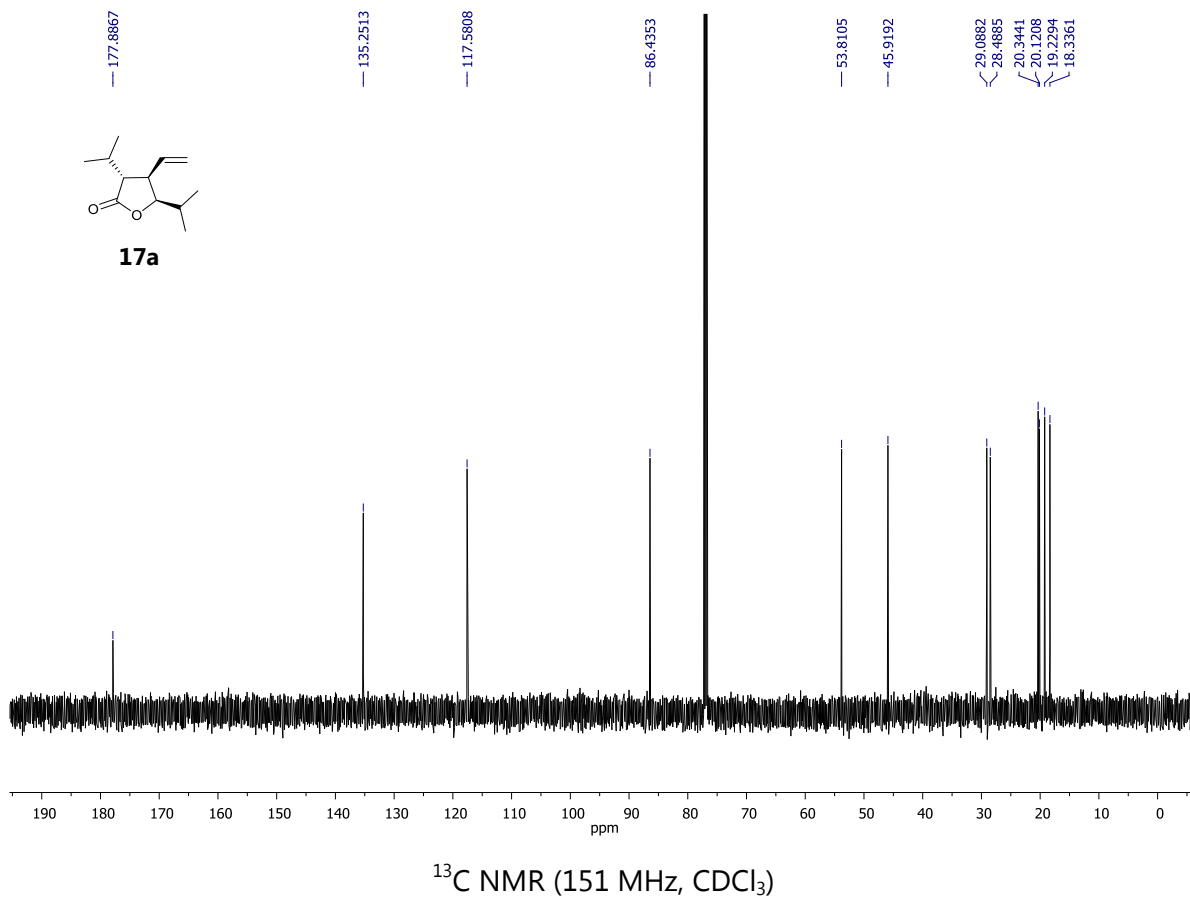

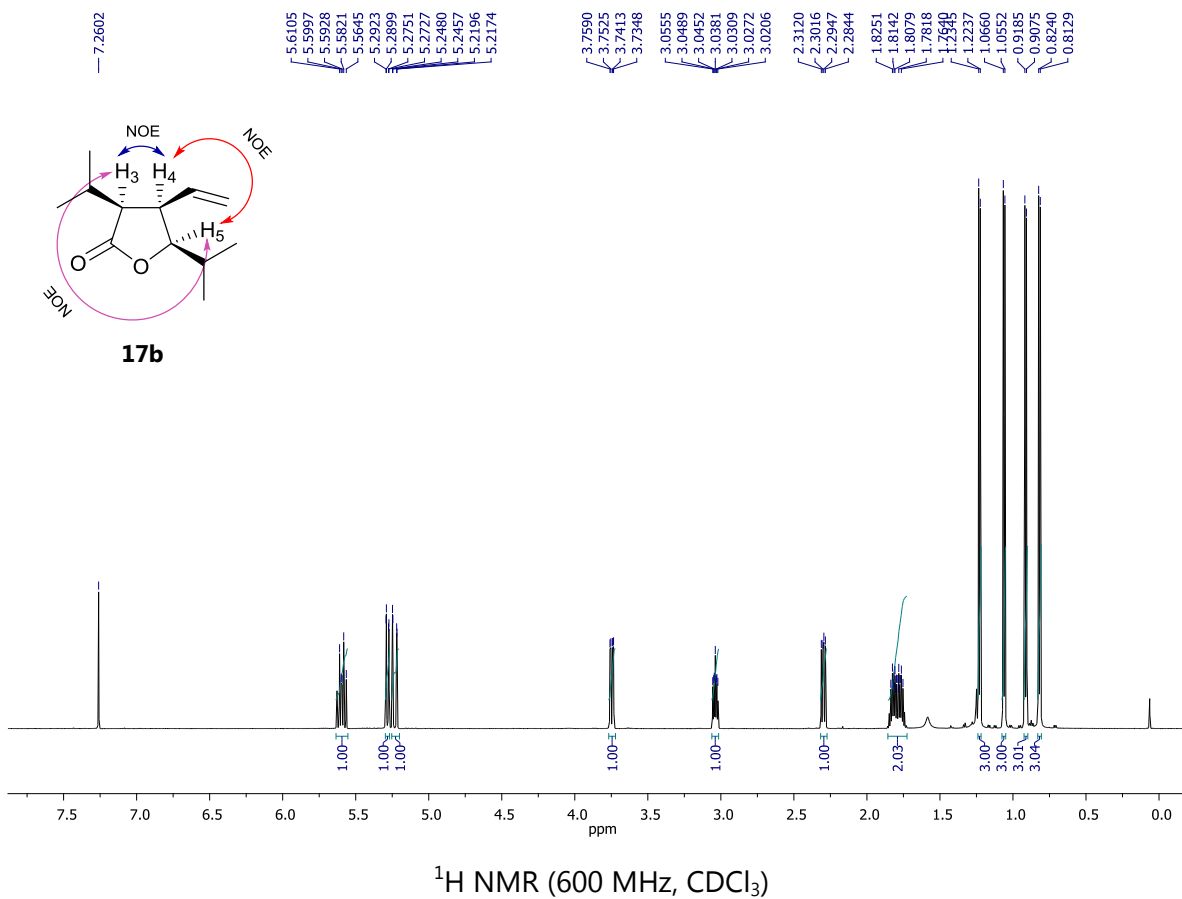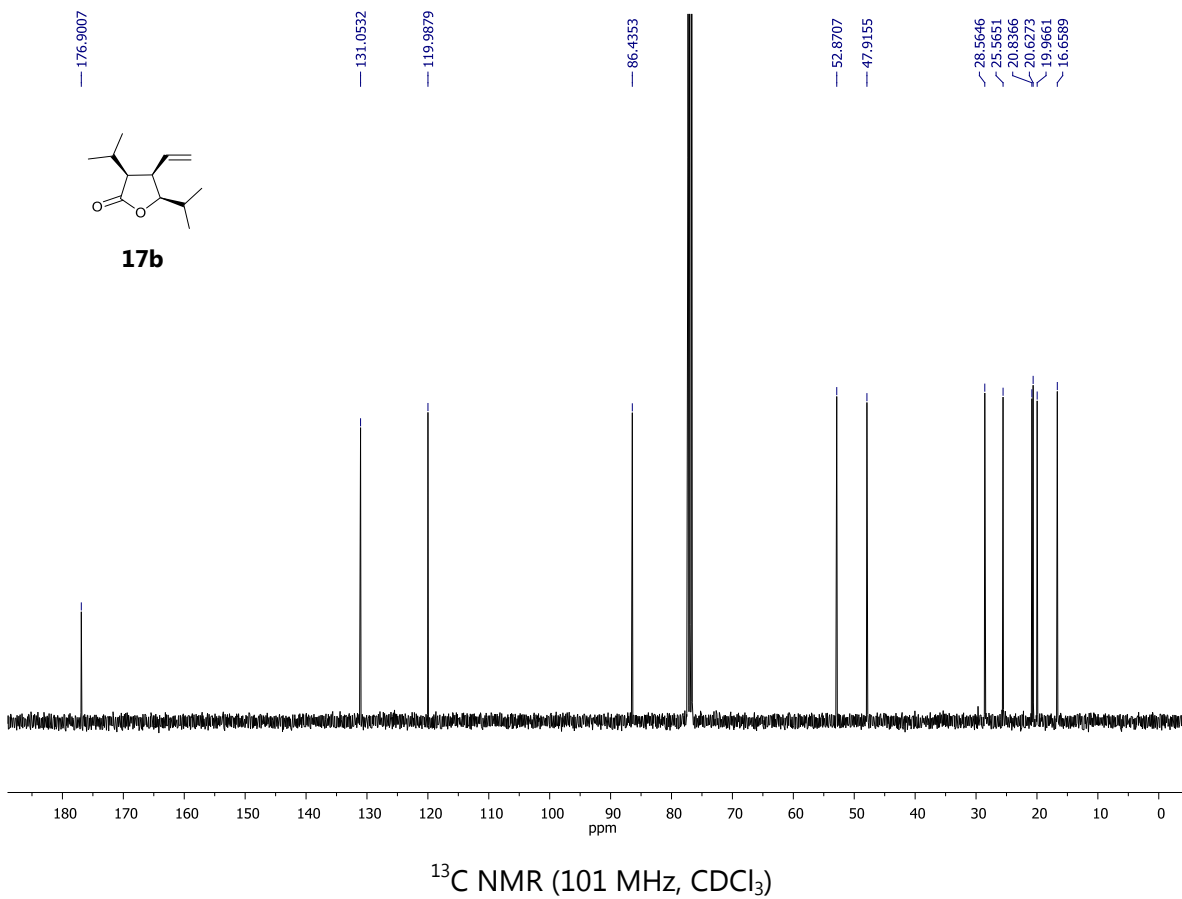

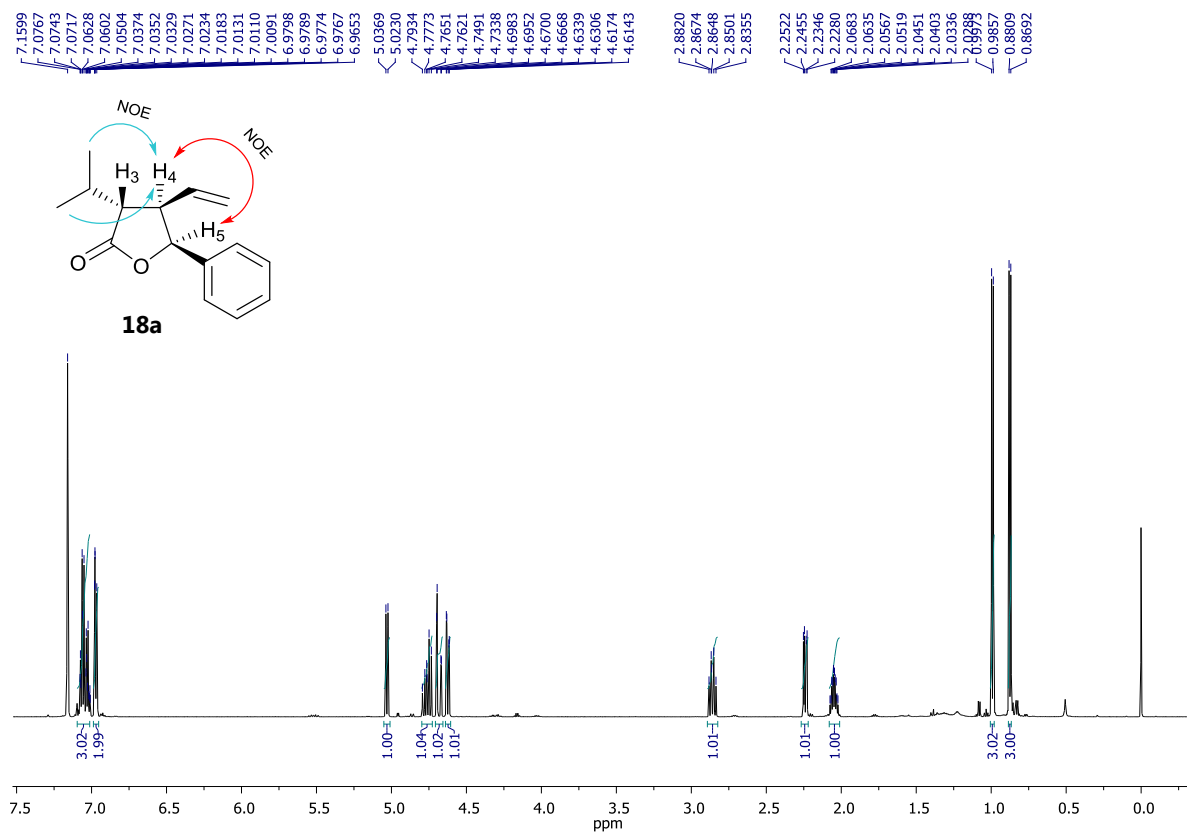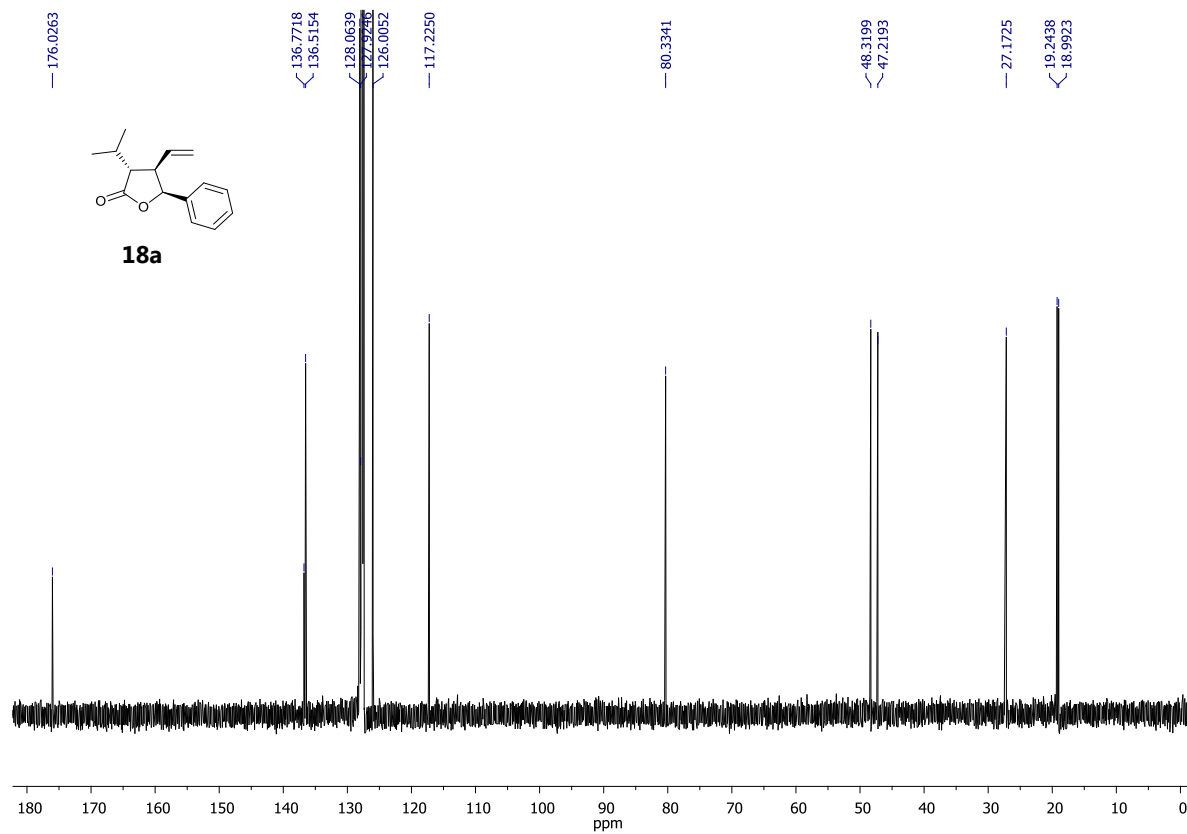

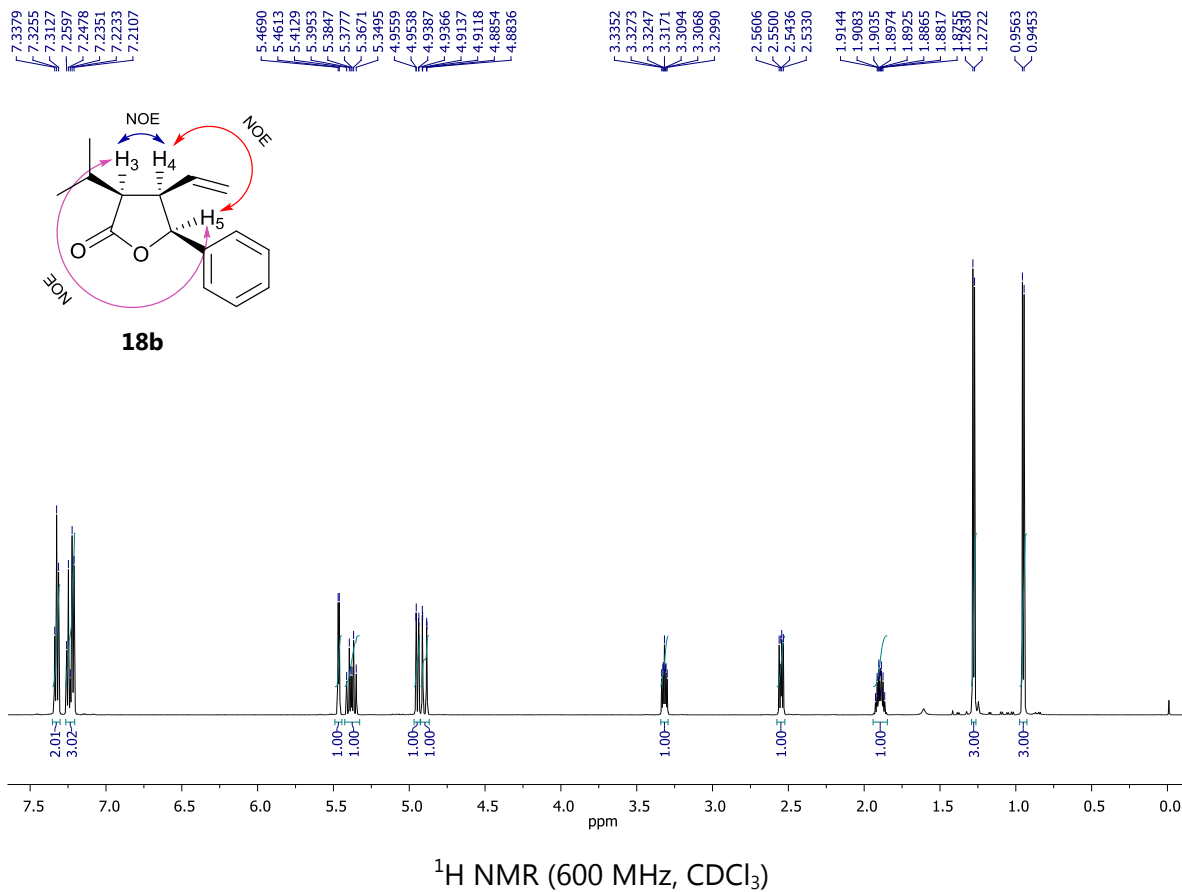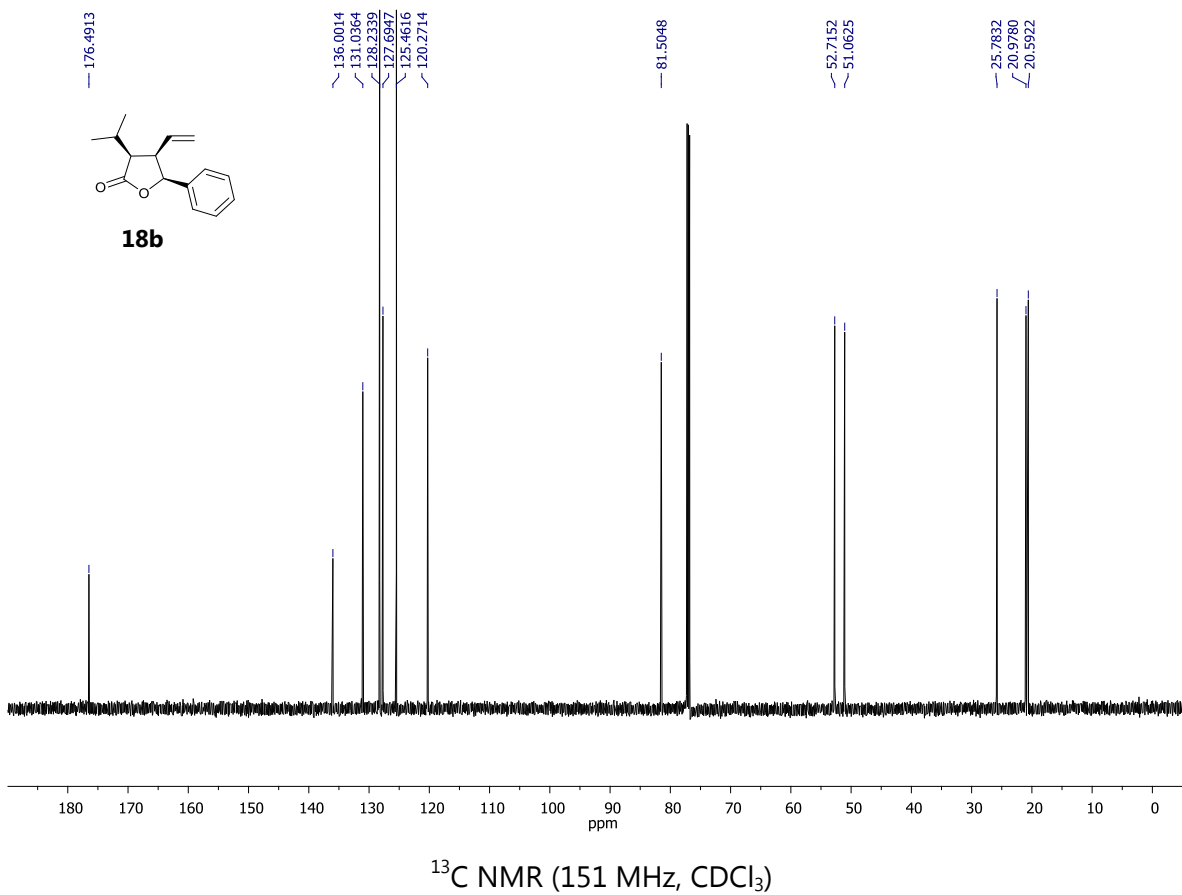

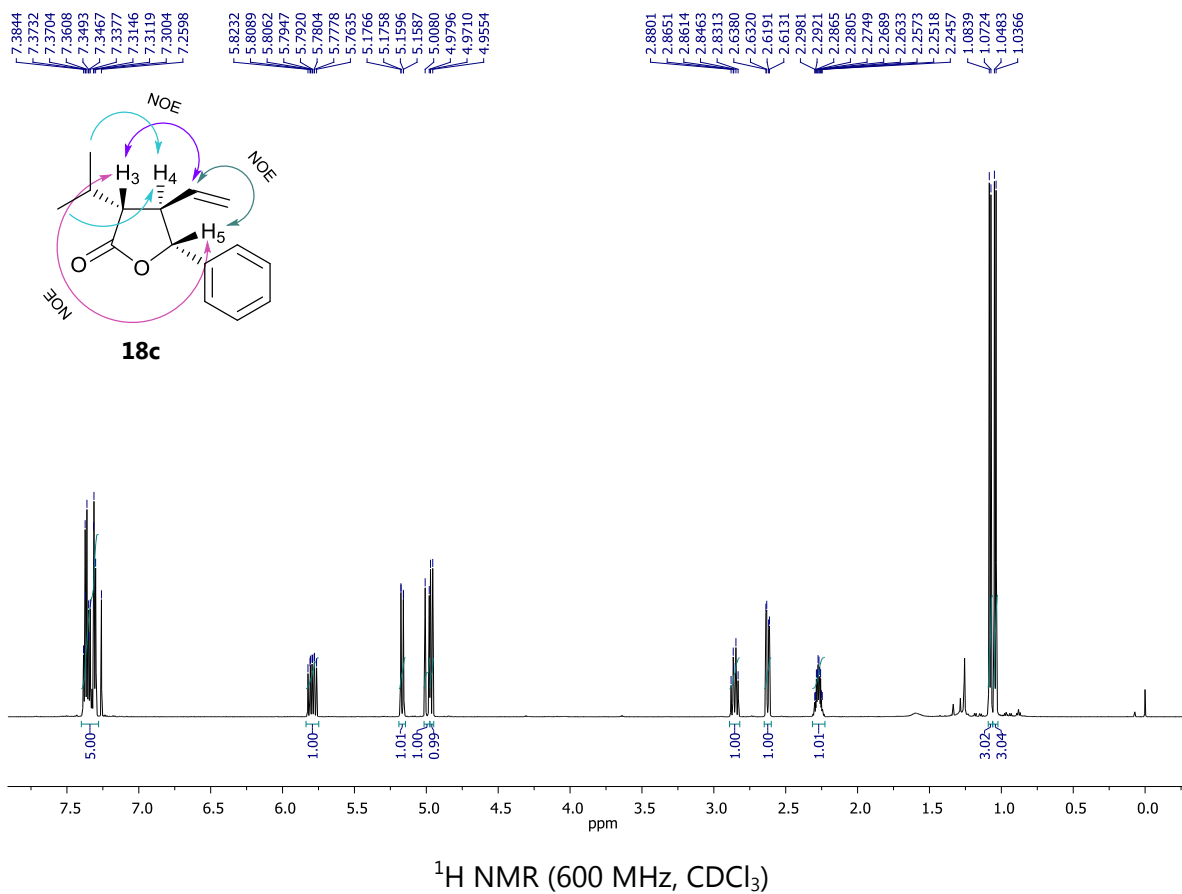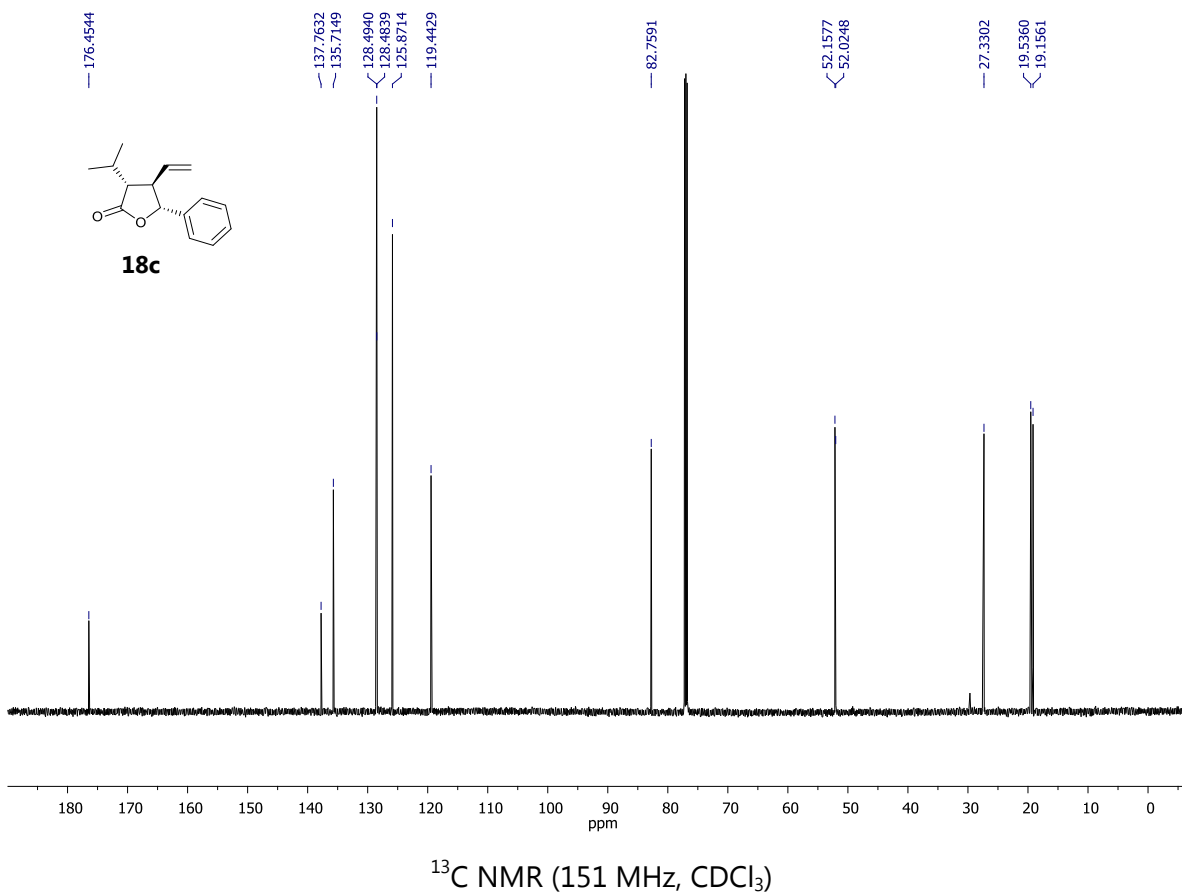

# Copies of $^{19}\text{F}$ NMR spectra of Moscher's esters

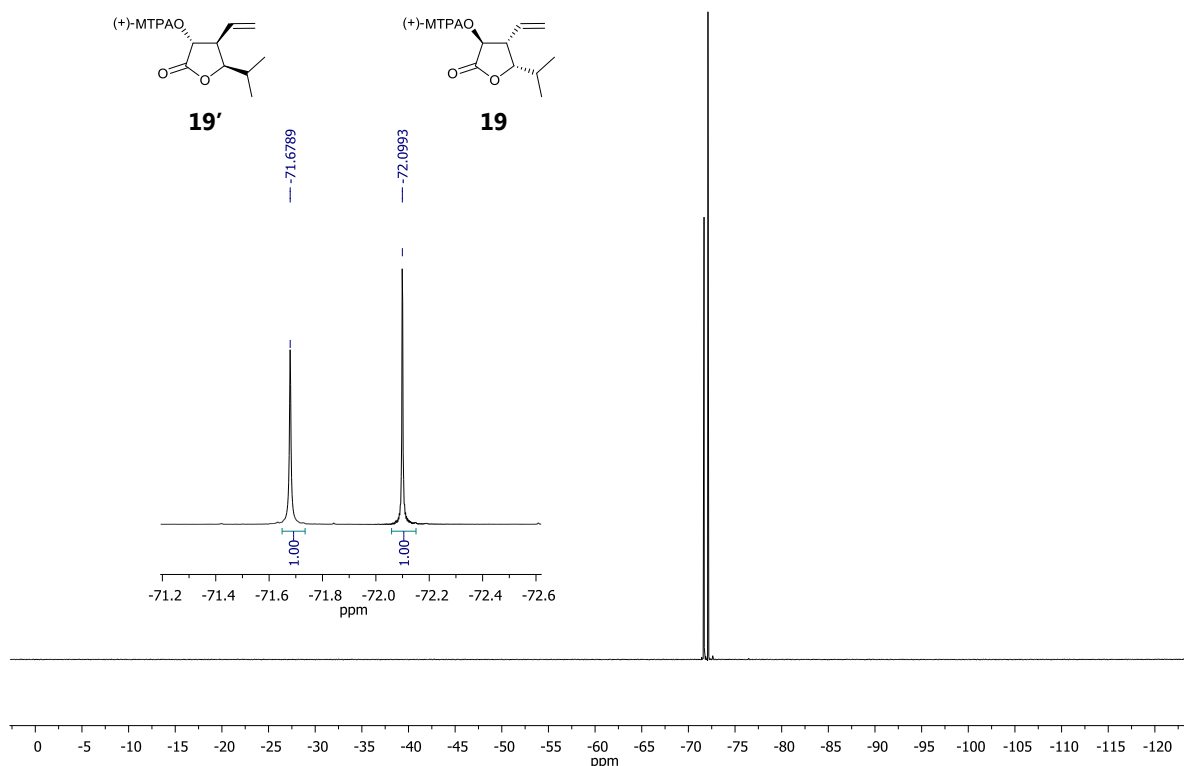

$^{19}\text{F}$  NMR (376 MHz,  $\text{CDCl}_3$ )

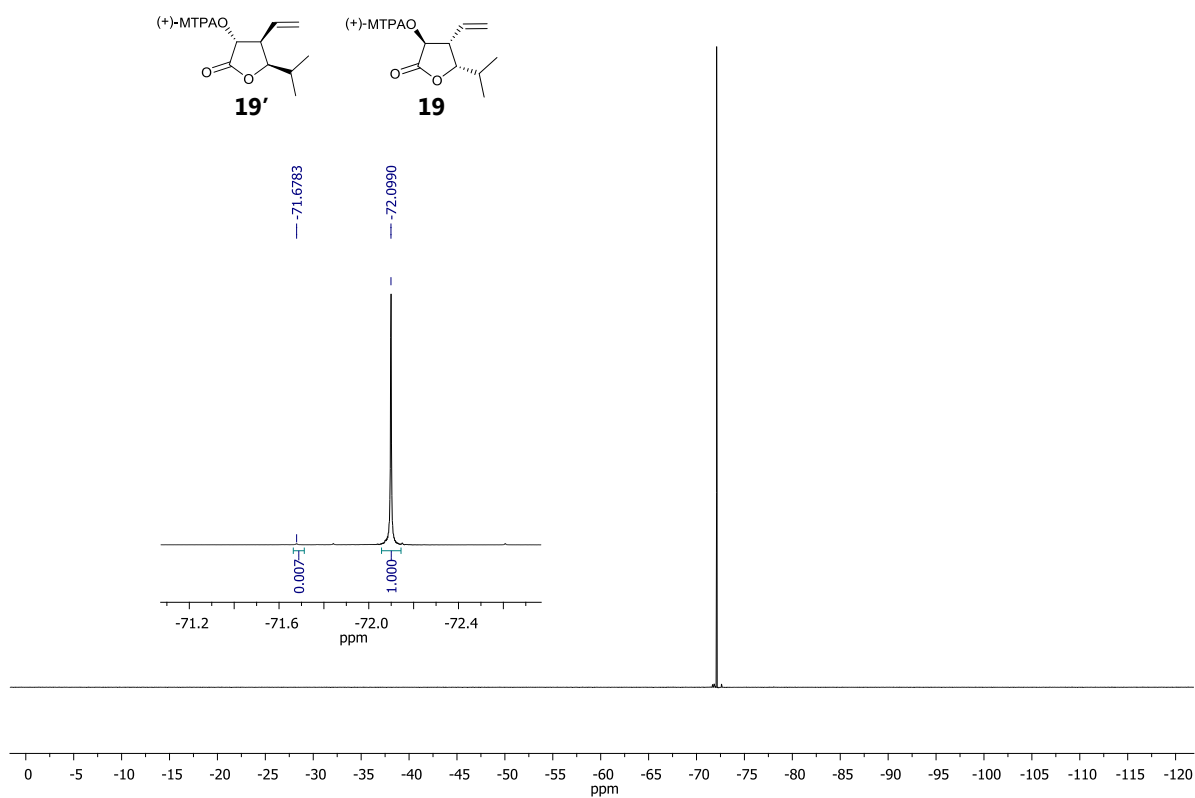

$^{19}\text{F}$  NMR (376 MHz,  $\text{CDCl}_3$ )

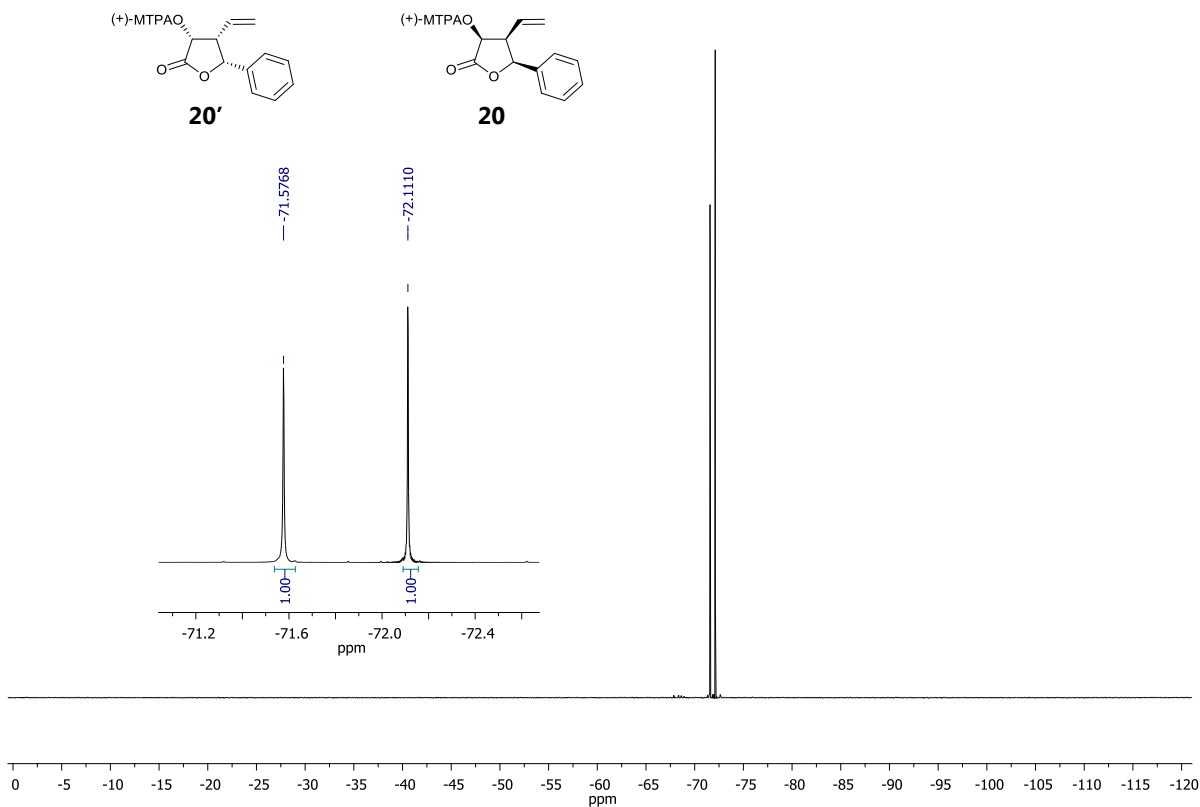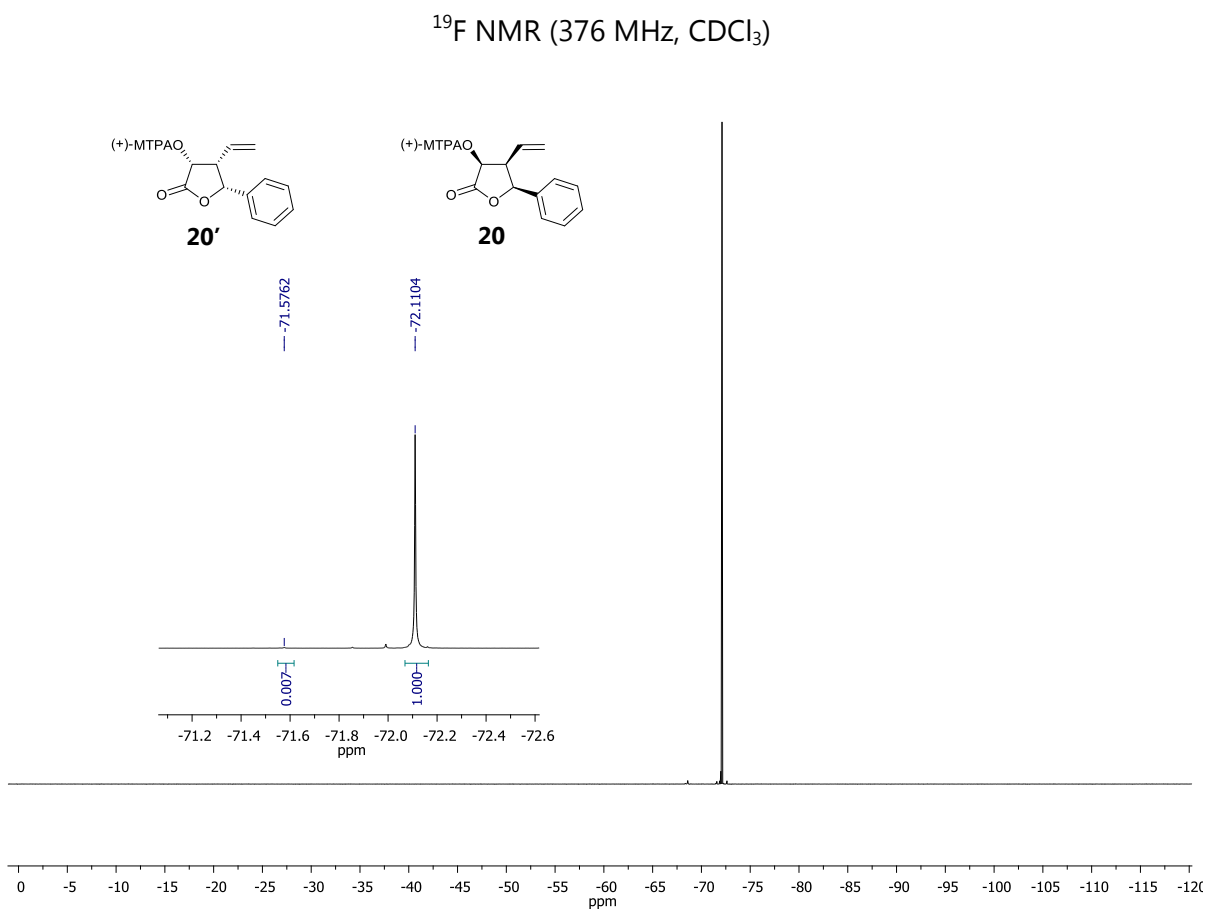



## HPLC chromatograms of (-)-**1** and (±)-**1** :

Nonracemic  $\beta$ -lactam (-)-**1** was prepared from compound (-)-**1** according to the literature procedure.<sup>[1]</sup>

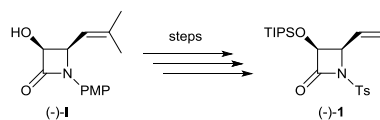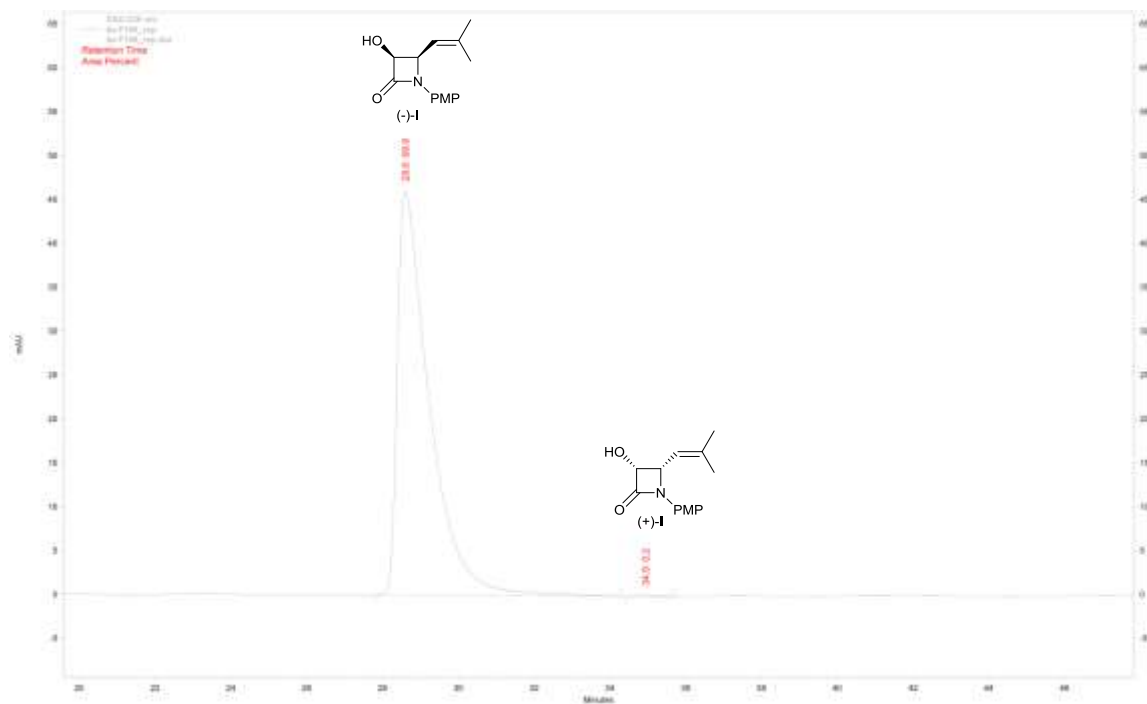

Chromatogram of (-)-**1** (IB column; hexane/*i*-PrOH 97:3; 1.0 mL/min,  $\lambda = 212$  nm): major peak 28.6 min (ee > 99%)

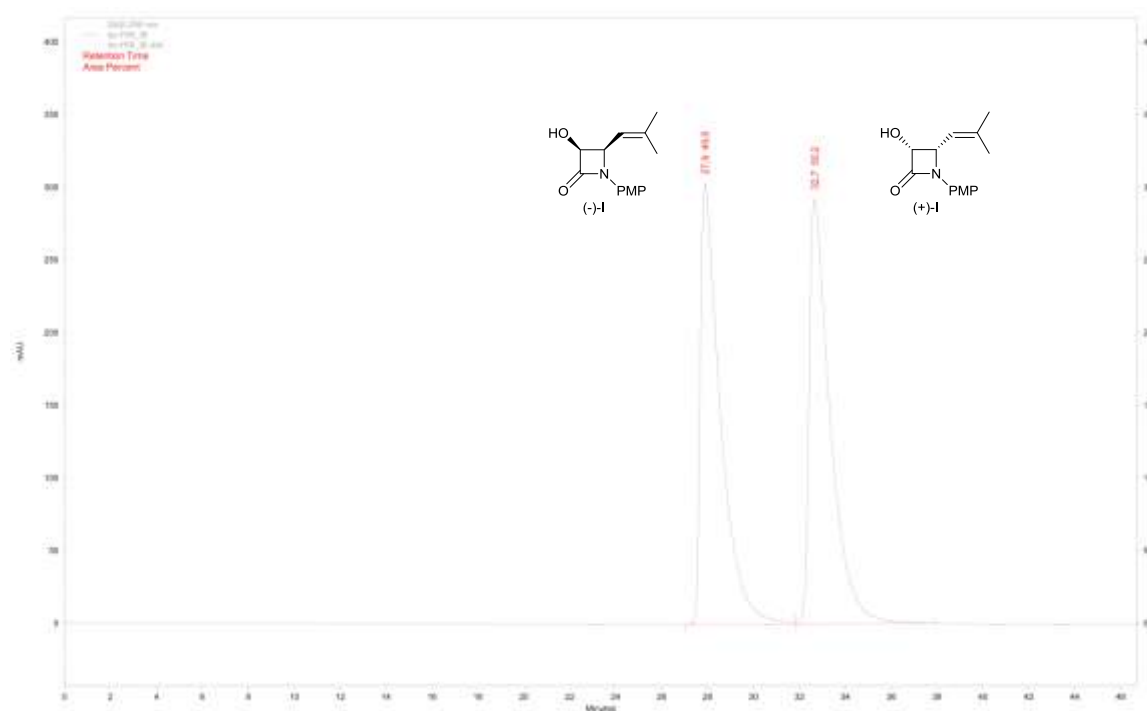

Chromatogram of (±)-**1** (IB column; hexane/*i*-PrOH 97:3; 1.0 mL/min,  $\lambda = 212$  nm): 28.6 min ((-)-**1**), 34.9 min ((+)-**1**)

## References :

- [1] U. K. Klimczak, B. K. Zambroń, *Chem. Commun.* **2015**, 51, 6796–6799.
